# Supplementary material for: Koumine Suppresses IL-1β Secretion and Attenuates Inflammation Associated With Blocking ROS/NF-κB/NLRP3 Axis in Macrophages
Source: PubMed Central journal article supplement (PMC7851739; doi:10.3389/fphar.2020.622074), 2021-01-18

## Supplementary Figures

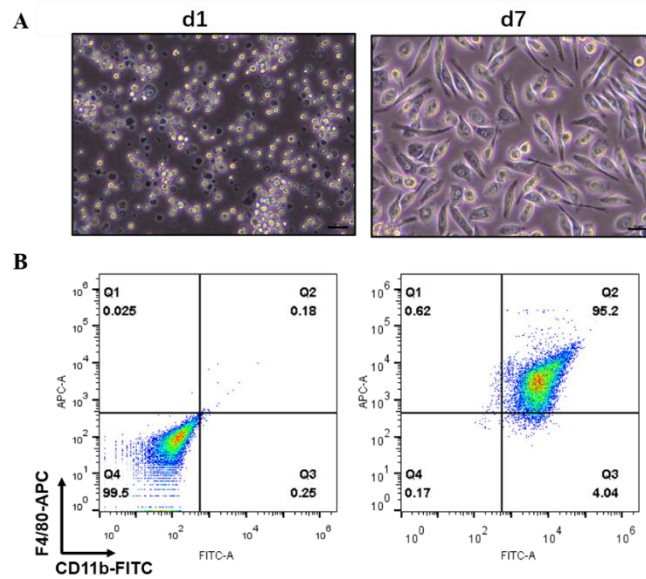

**FIGURE S1 Mouse bone marrow cells differentiate into macrophages.** Mouse bone marrow cells were induced by incubation in BM-medium for 7 days, and the culture medium was replaced every other day. (A) Micrographs of cells were observed using a bright-field Leica DMI8 imaging system. Scale bar, 50  $\mu$ m. (B) The specific macrophage markers F4/80 and CD11b were detected by flow cytometry.

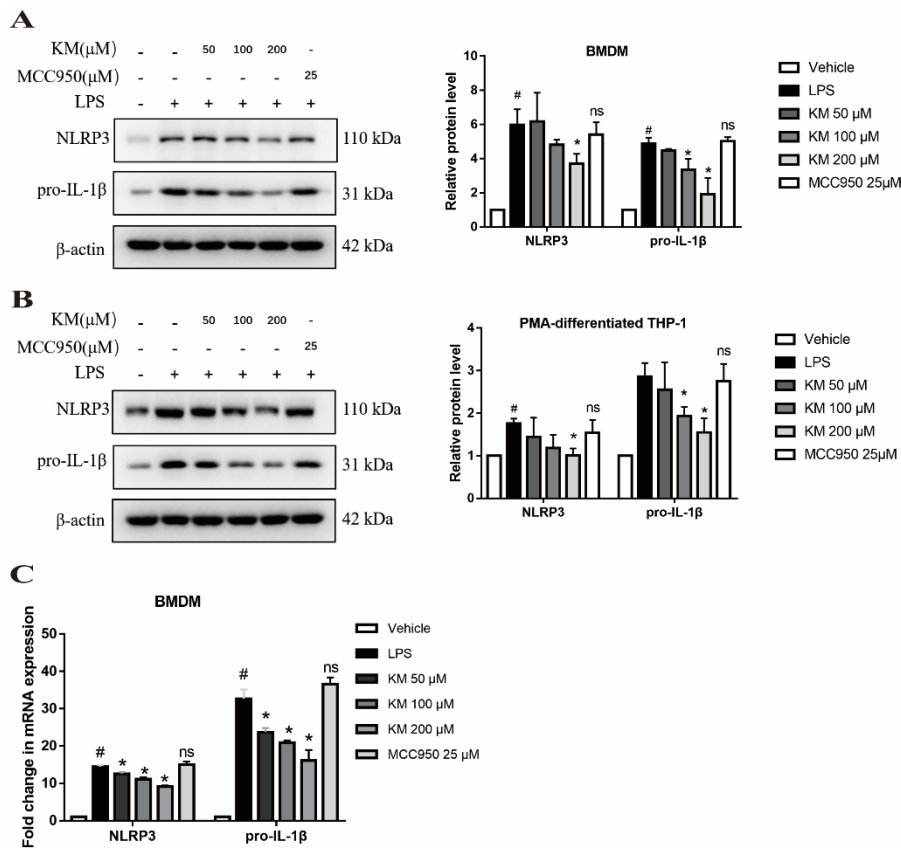

**FIGURE S2 Koumine (KM) inhibits the expression of NLRP3 and pro-IL-1 $\beta$  stimulated by LPS in macrophages.** (A) BMDMs or (B) PMA-differentiated THP-1 cells were pretreated with KM or MCC950 for 1 h and then incubated with LPS (300 ng/ml) for 3 h. Cell lysates were collected and analyzed by immunoblotting for NLRP3 and pro-IL1 $\beta$ . The mRNA levels of NLRP3 and pro-IL1 $\beta$  in (A) were analyzed by RT-qPCR. Mean  $\pm$  SD of 3 independent experiments are shown. # $P$  < 0.05 versus vehicle group, \* $P$  < 0.05 versus LPS group.

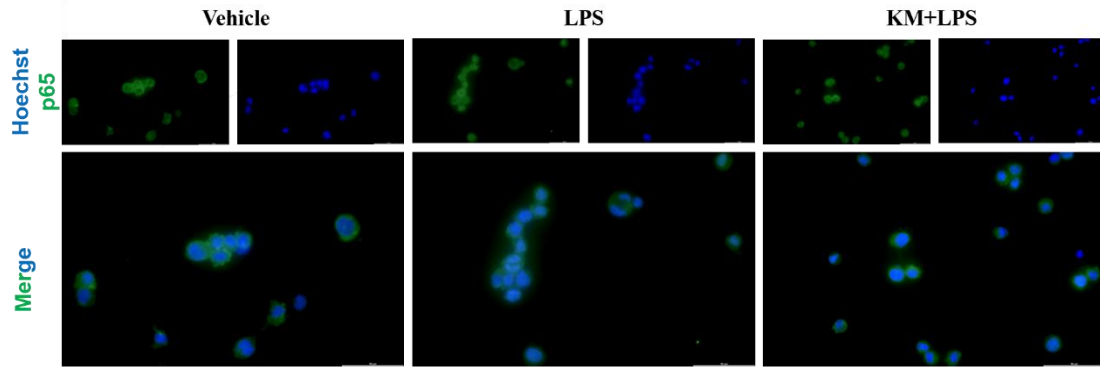

**FIGURE S3 Koumine (KM) suppresses the p65 nuclear localization in PMA-differentiated THP-1 macrophages.** PMA-differentiated THP-1 macrophages were pretreated with KM (200  $\mu$ M) for 1 h and then incubated with LPS (300 ng/ml) for 1 h. The nuclear location of p65 in PMA-differentiated THP-1 macrophages were visualized by immunofluorescence analysis with an anti-p65 (green) antibody. The nuclei (blue) were stained with Hoechst 33324. Scale bars, 50  $\mu$ m.

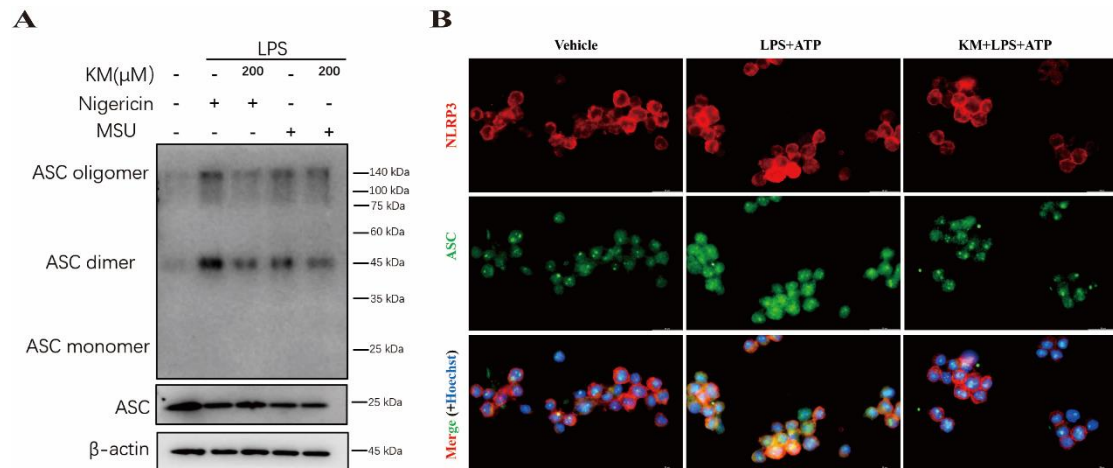

**FIGURE S4 Koumine (KM) blocks NLRP3 inflammasome assembly in macrophages.** (A) BMDMs were pretreated with KM (200  $\mu$ M) for 1 h and then incubated with LPS (300 ng/ml) for 3 h, nigericin (10  $\mu$ M) for 1 h or MSU (150  $\mu$ g/ml) for 6 h. ASC oligomerization in cross-linked cytosolic pellets were analyzed by immunoblotting. (B) PMA-differentiated THP-1 macrophages were pretreated with KM (200  $\mu$ M) for 1 h and then incubated with LPS (300 ng/ml) for 3 h and ATP (5 mM) for 1 h. The interaction between NLRP3 (red) and ASC (green) in cells were assayed by immunofluorescence. Scale bas, 25  $\mu$ m.

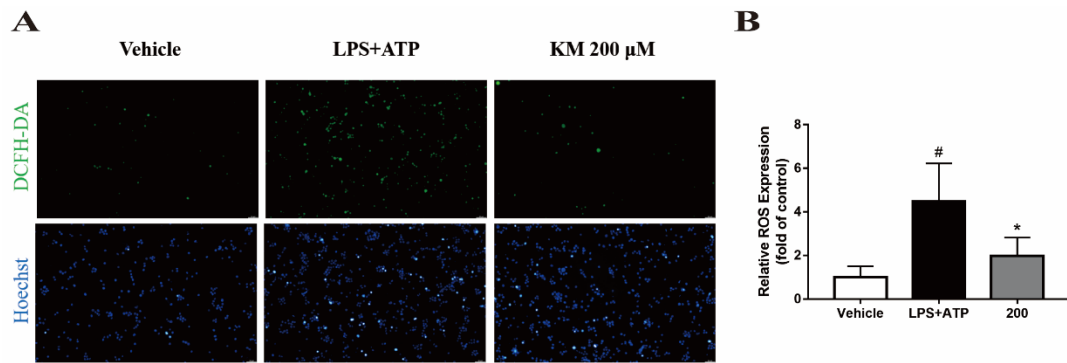

**FIGURE S5 Koumine (KM) inhibits ROS generation triggered by LPS and ATP in PMA-differentiated THP-1 macrophages.** PMA-differentiated THP-1 macrophages were pretreated with KM (200  $\mu$ M) for 1 h and then incubated with LPS (300 ng/ml) for 3 h and ATP (5 mM) for 1 h. Intracellular ROS were labeled with the DCFH-DA probe and examined by fluorescence microscopy. Scale bar, 50  $\mu$ m. Mean  $\pm$  SD of 3 independent experiments are shown. <sup>#</sup> $P < 0.05$  versus vehicle group, <sup>\*</sup> $P < 0.05$  versus LPS plus ATP group.

The original western blots of figure 4.

FIGURE 4A

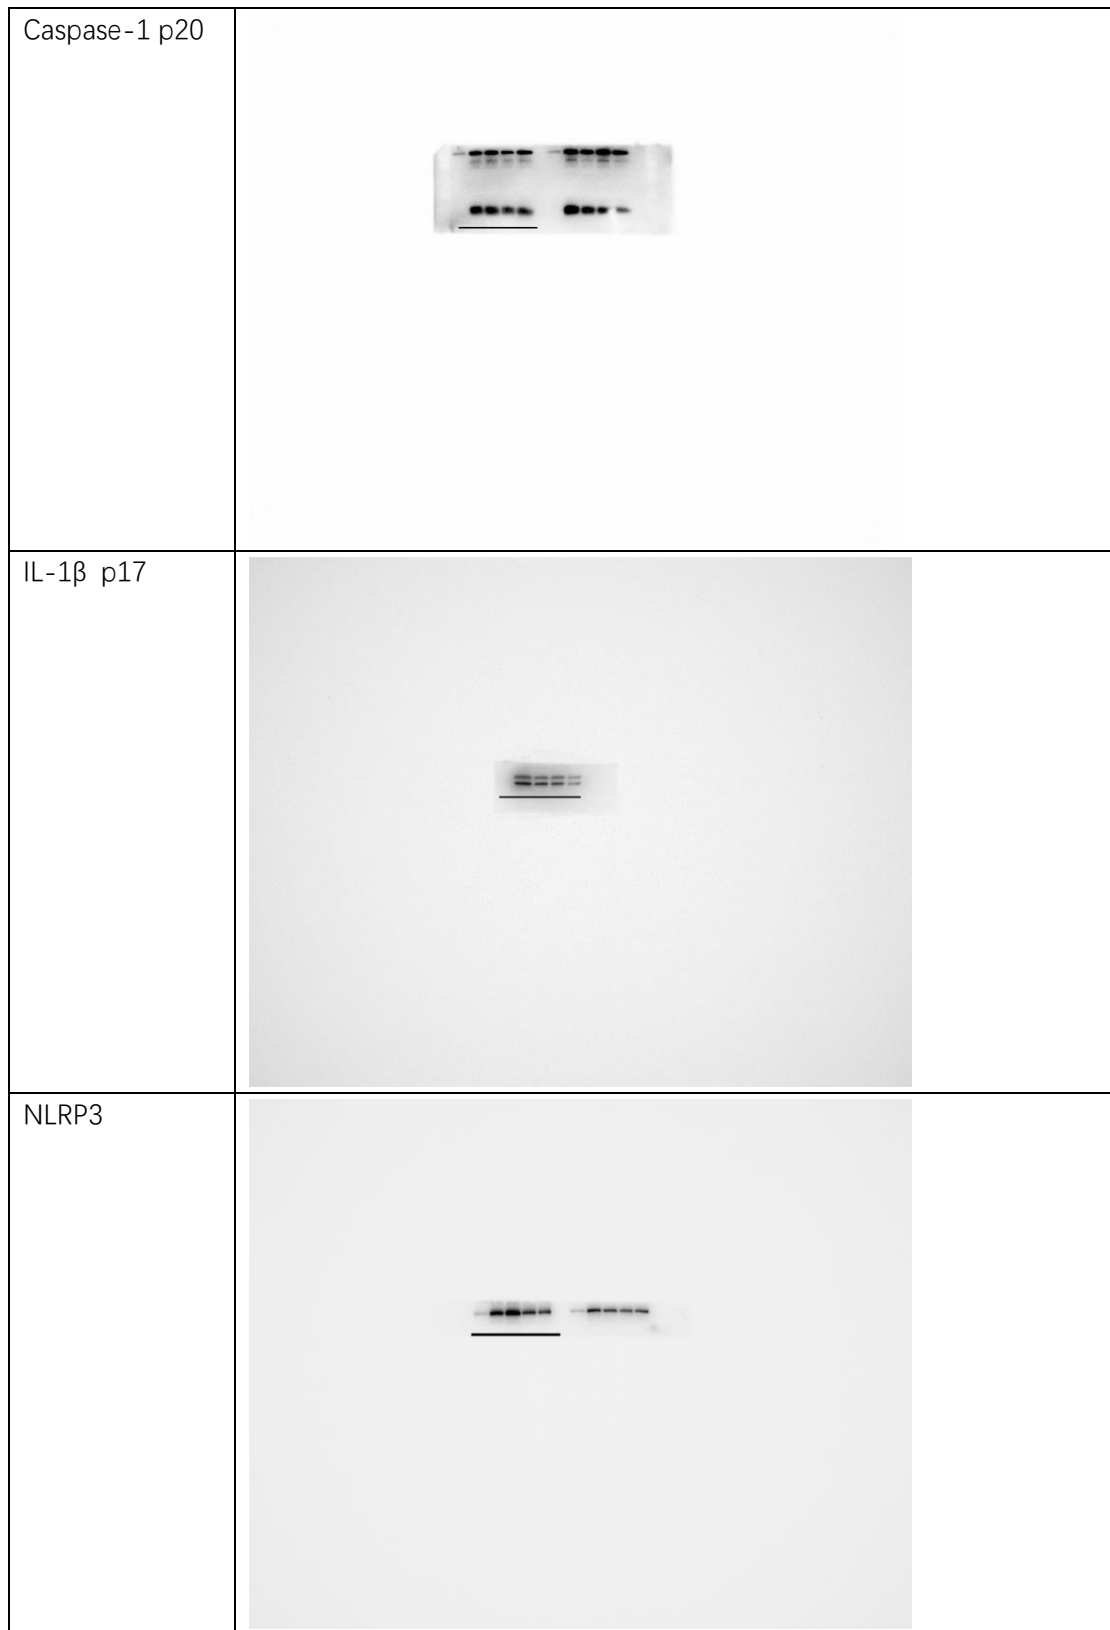

Pro-caspase-1

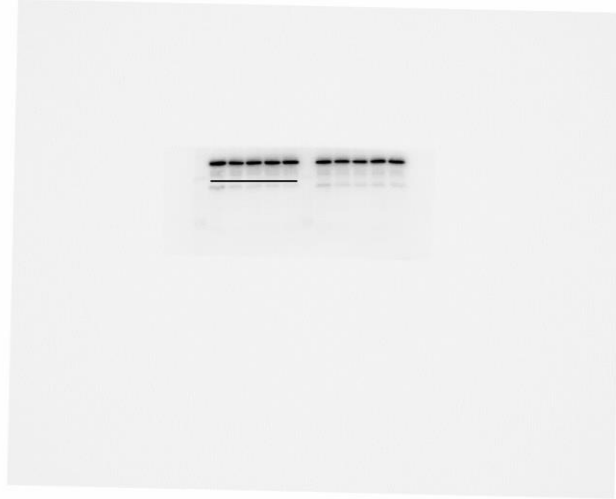

Pro-IL-1 $\beta$

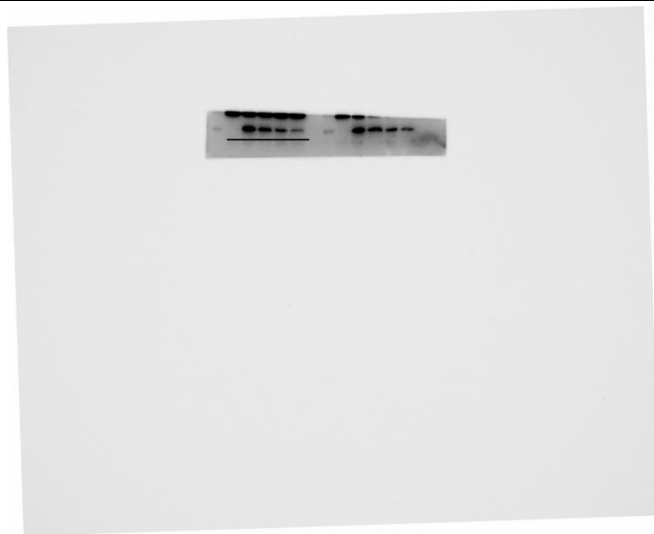

ASC

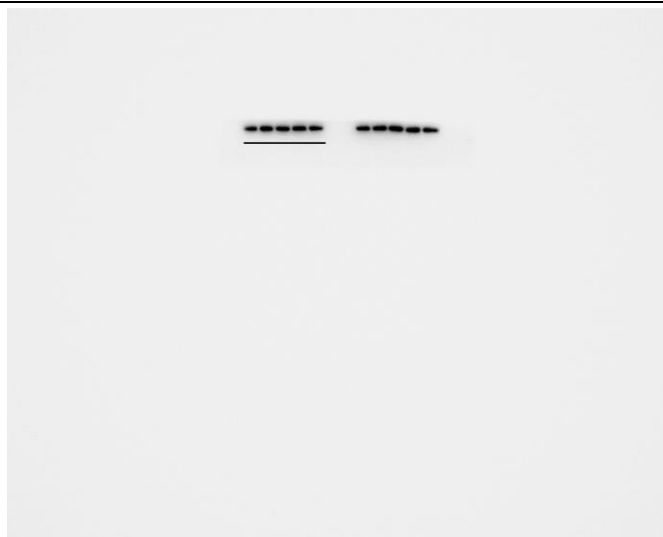

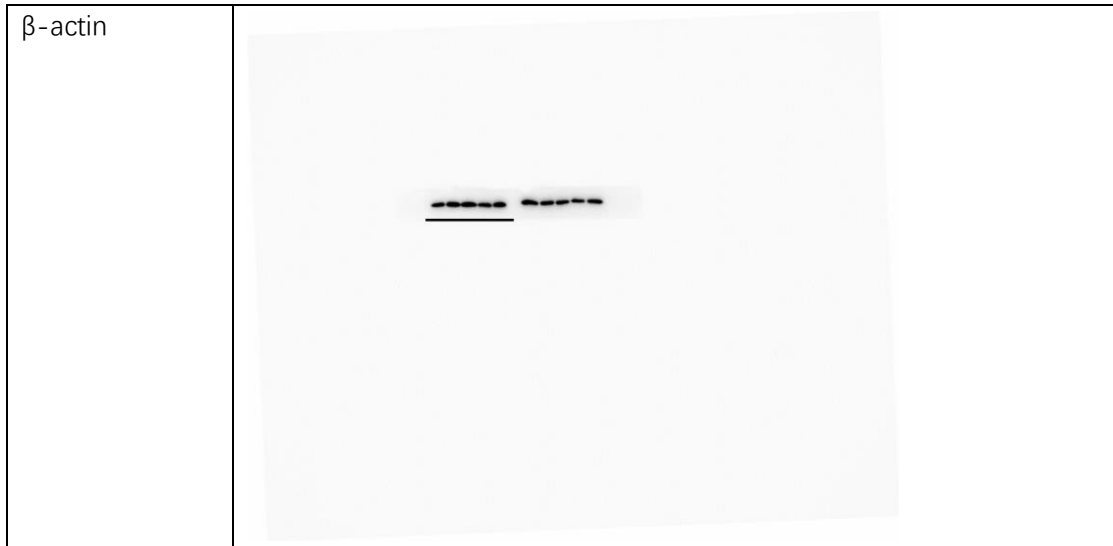

FIGURE 4C

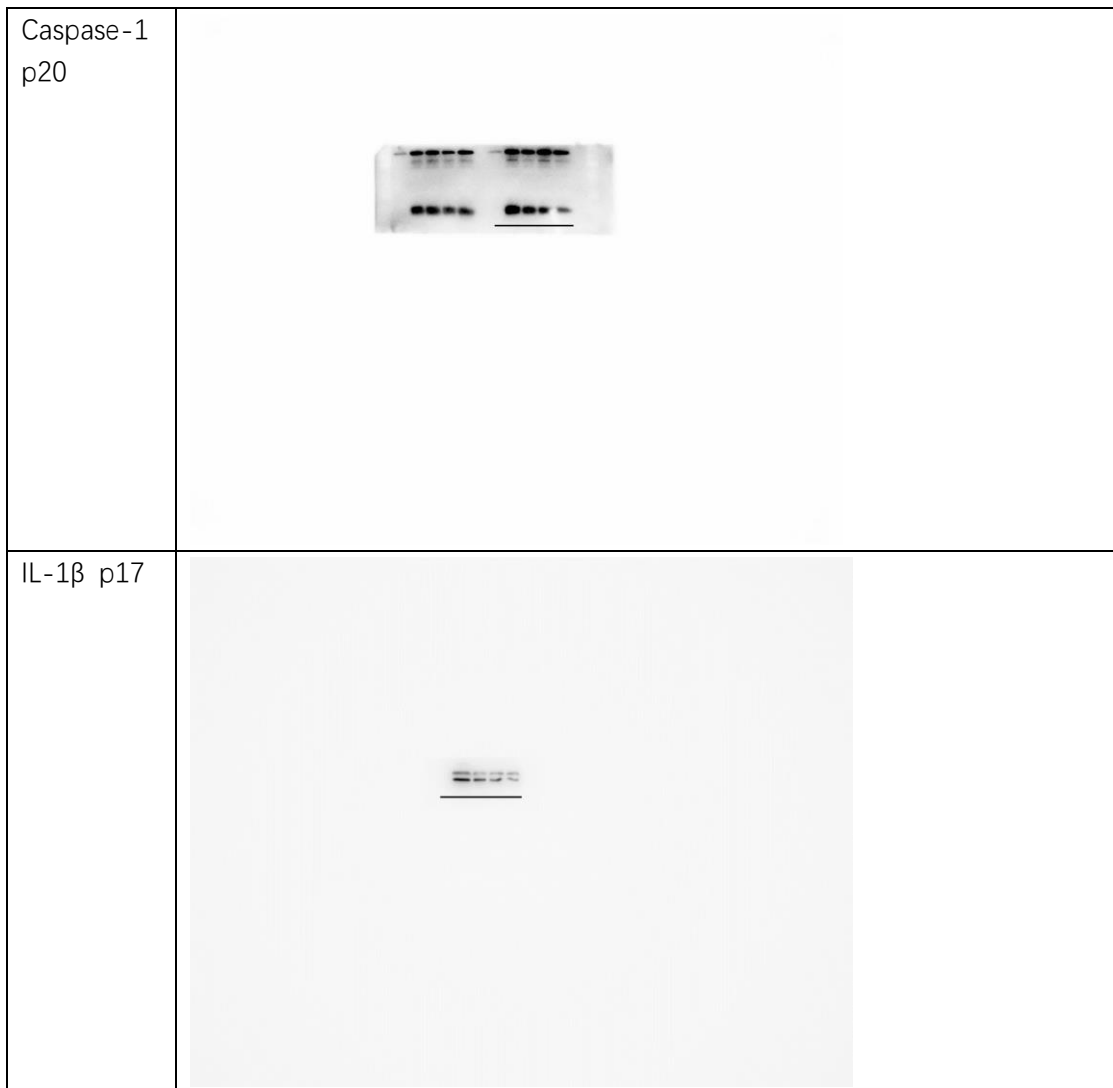

NLRP3

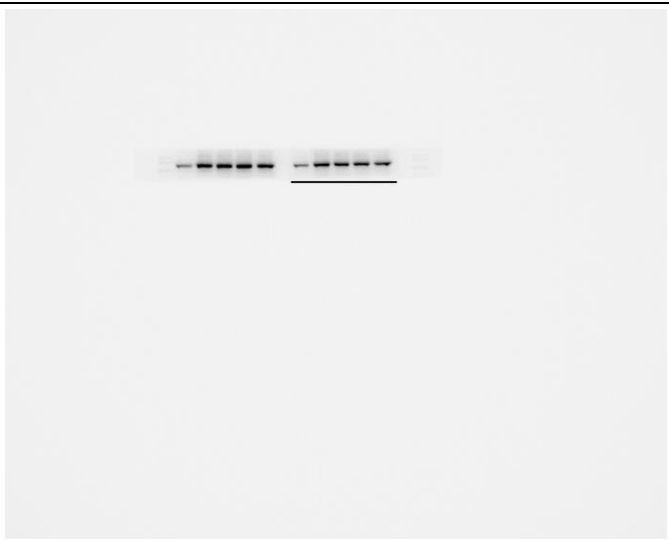

Pro-caspase-1

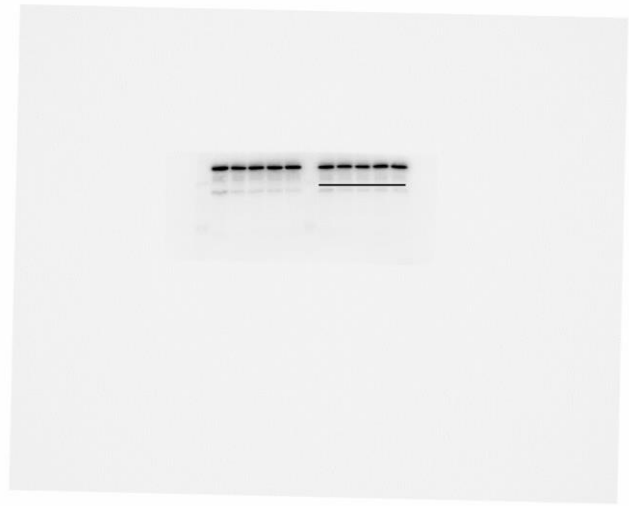

Pro-IL-1 $\beta$

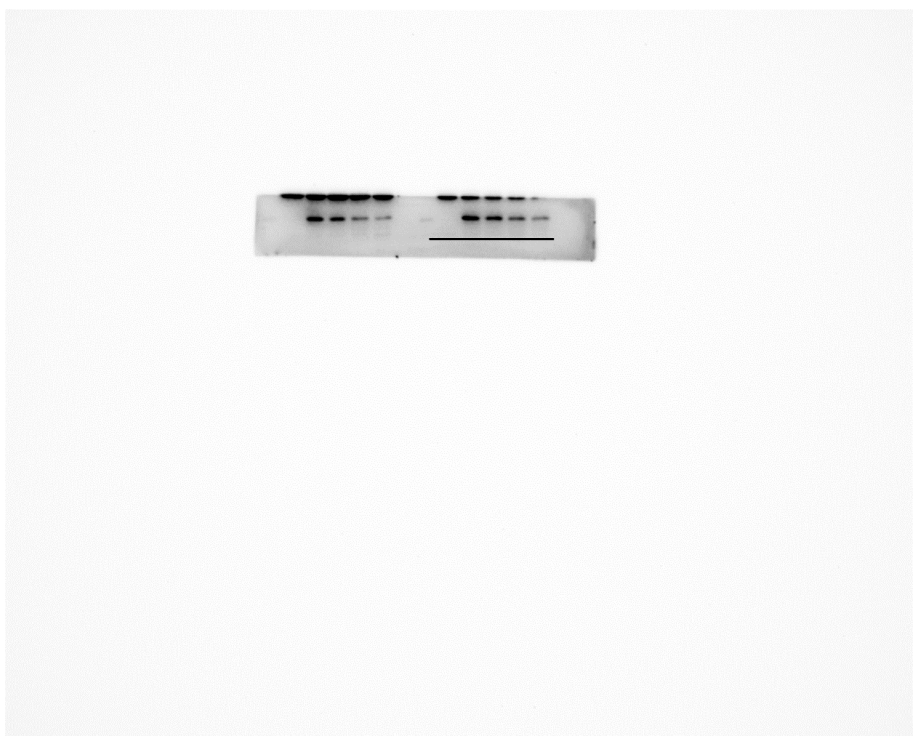

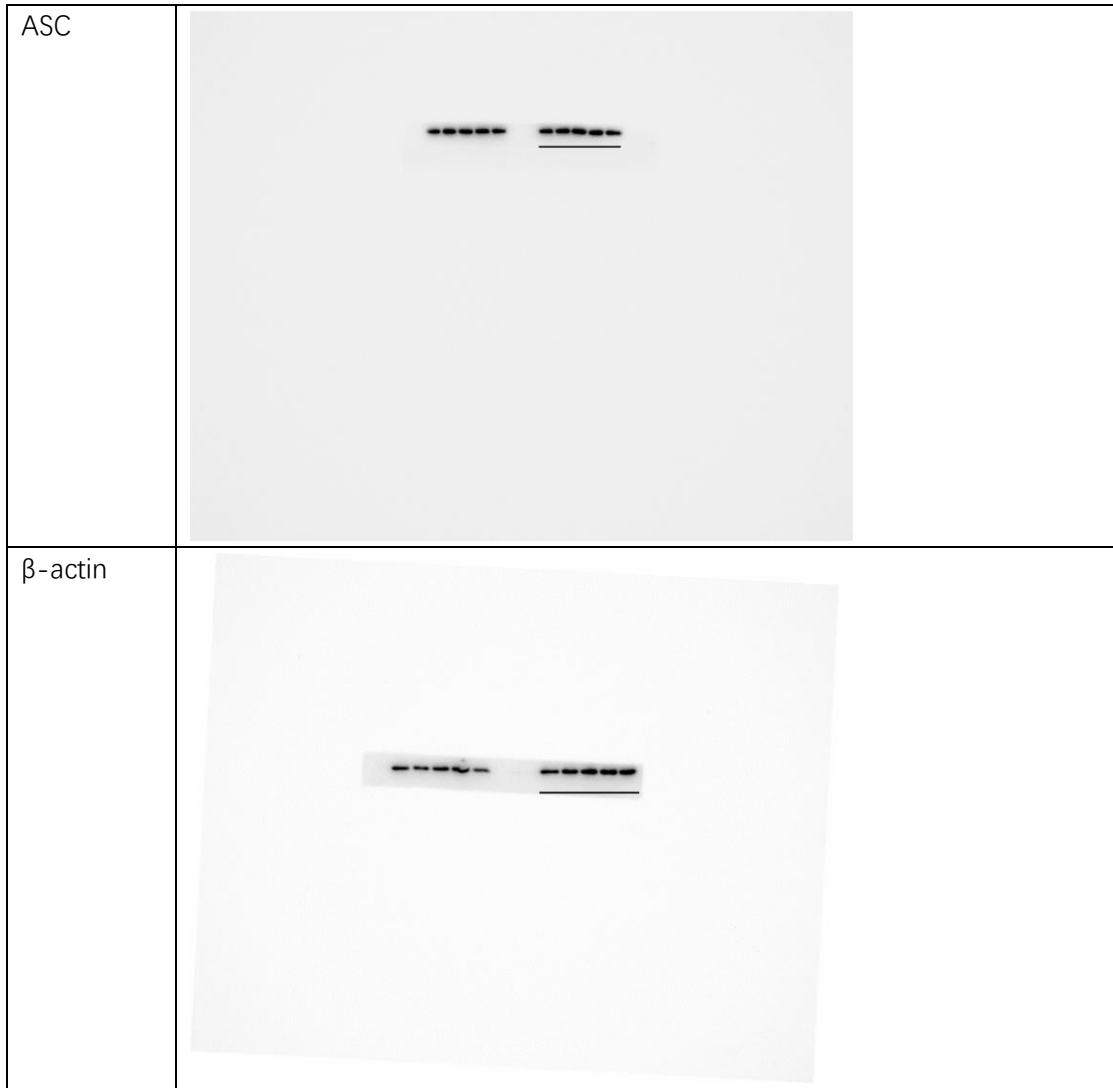

FIGURE 4E

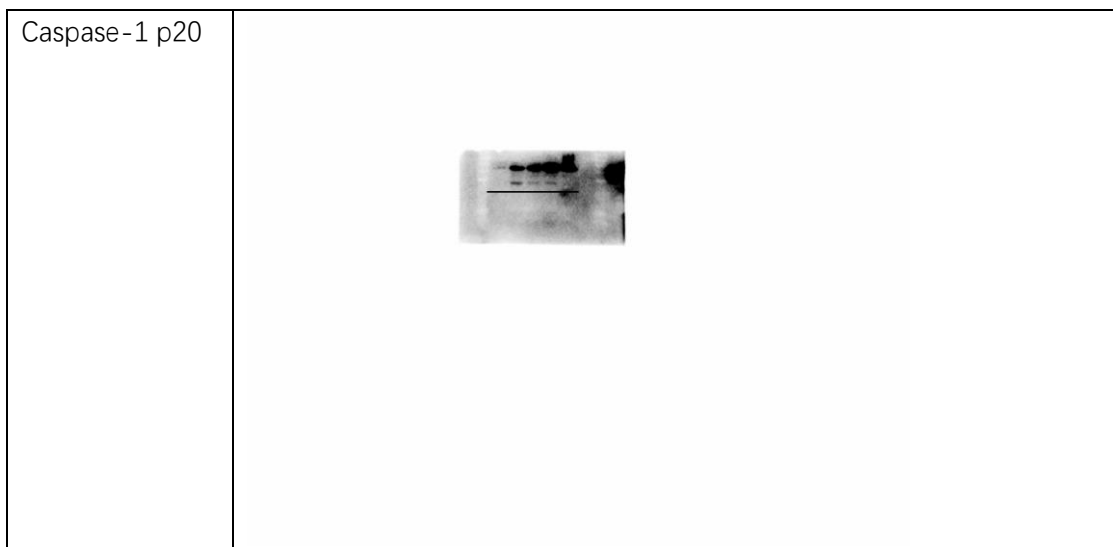



IL-1 $\beta$  p17

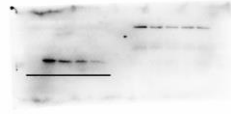

NLRP3

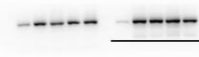

Pro-caspase-1

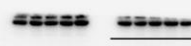

|                  |                                                                                          |
|------------------|------------------------------------------------------------------------------------------|
| Pro-IL-1 $\beta$ | 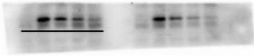        |
| ASC              | 7<br> |
| $\beta$ -actin   |      |

FIGURE 4G

Caspase-1 p20

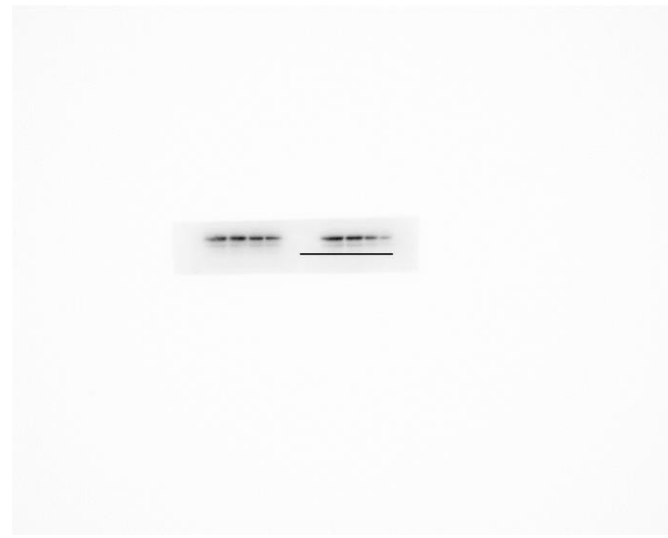

IL-1 $\beta$  p17

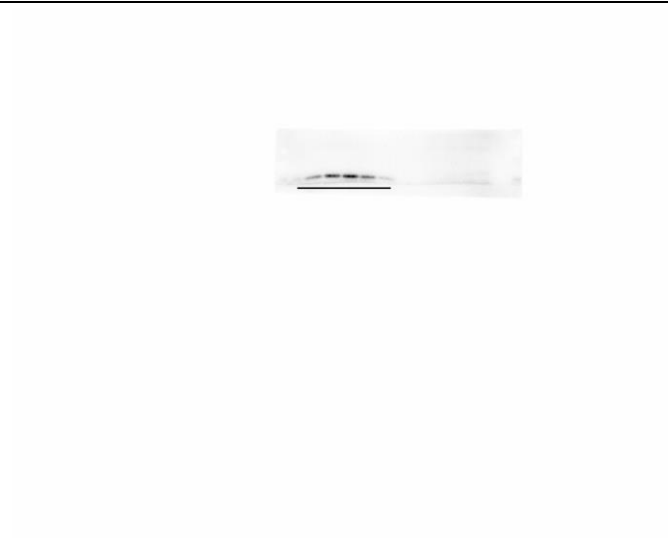

NLRP3

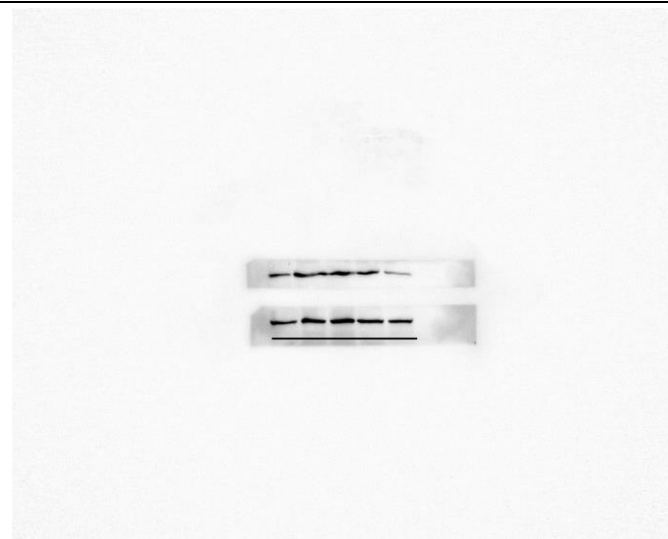

Pro-caspase-1

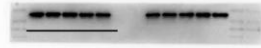

Pro-IL-1 $\beta$

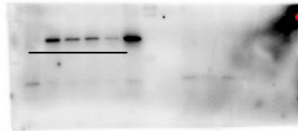

ASC

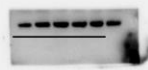

$\beta$ -actin

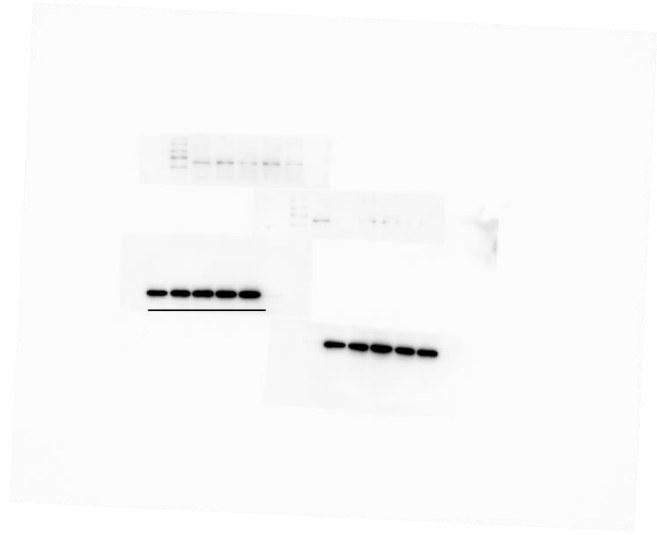

The original western blots of figure 5.

FIGURE 5A

p-p65

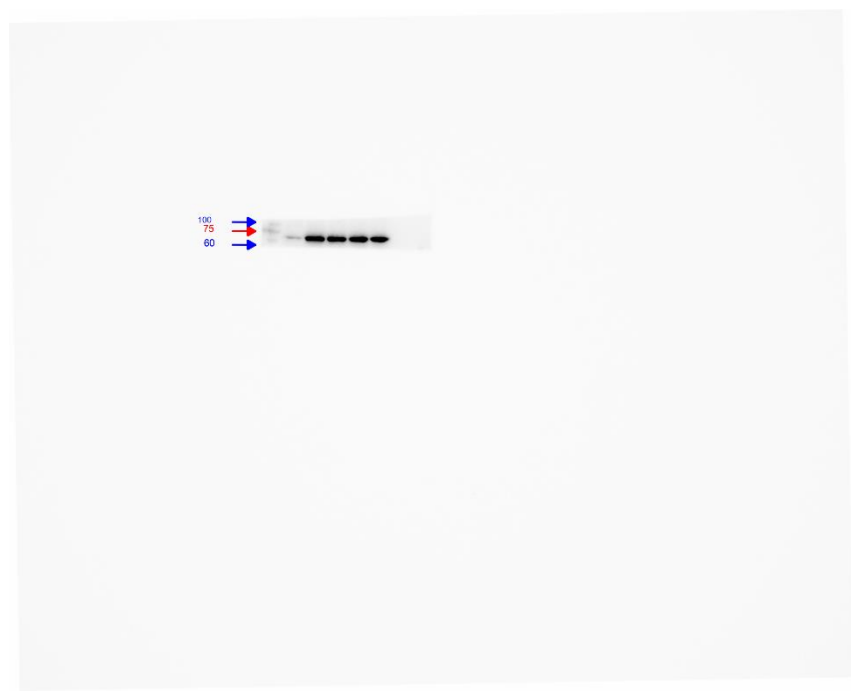

P65

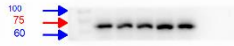

p-I $\kappa$ B $\alpha$

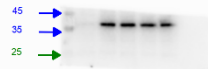

V

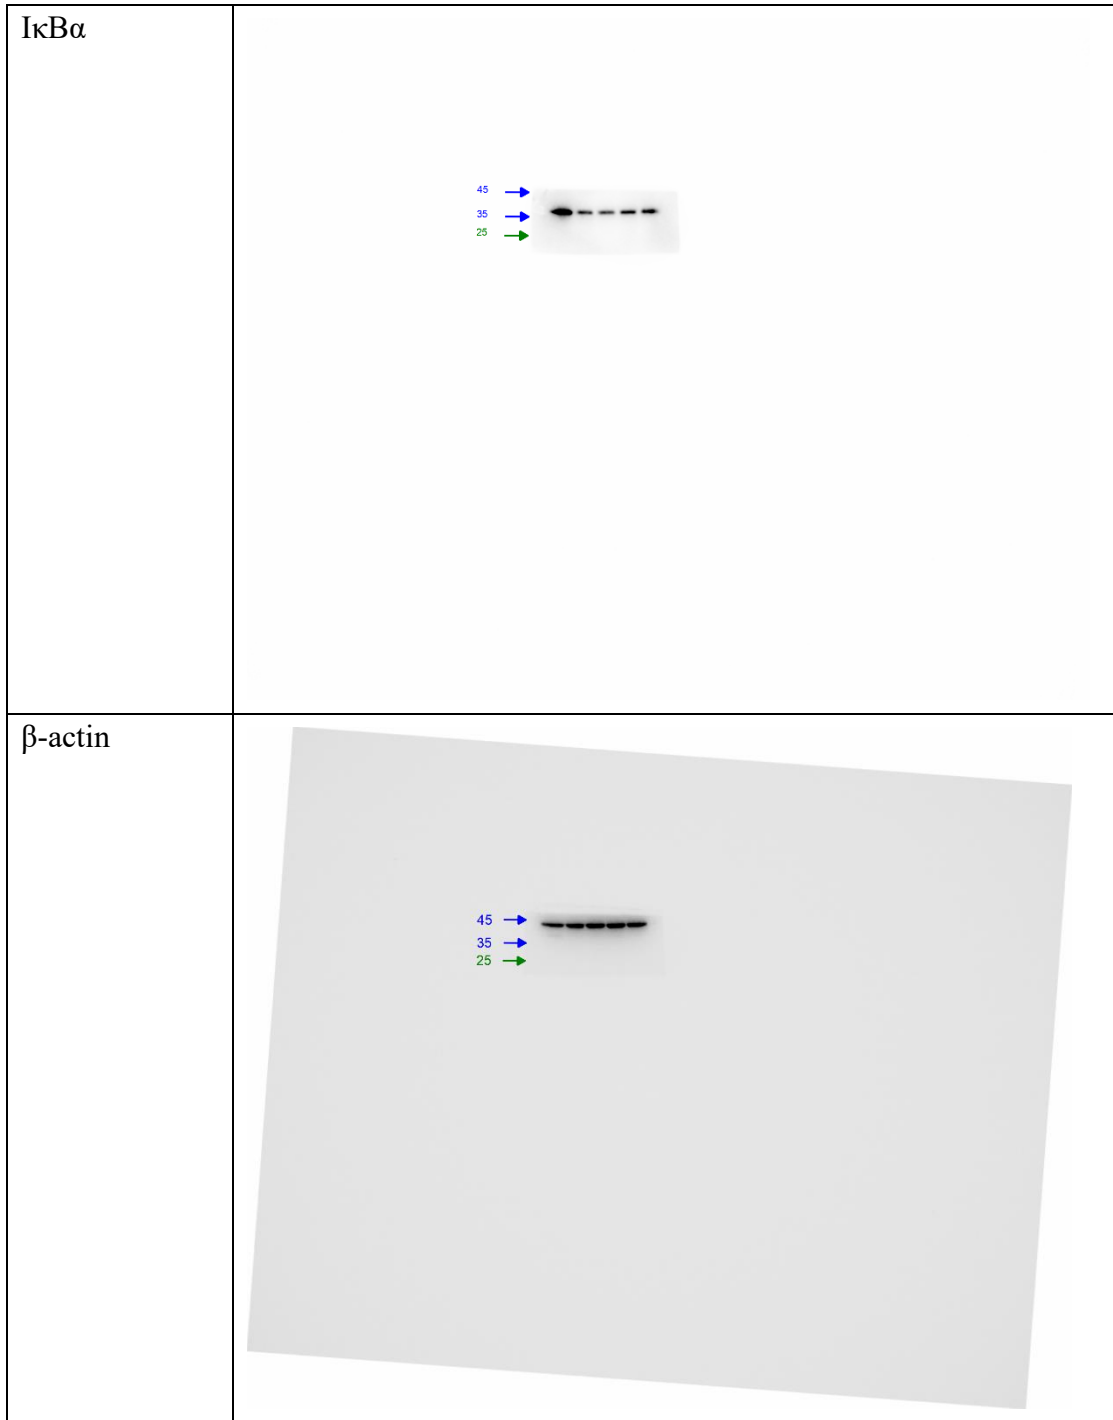

FIGURE 5C

P65

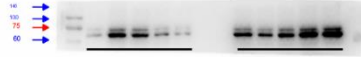

Histone H3

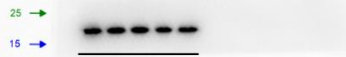



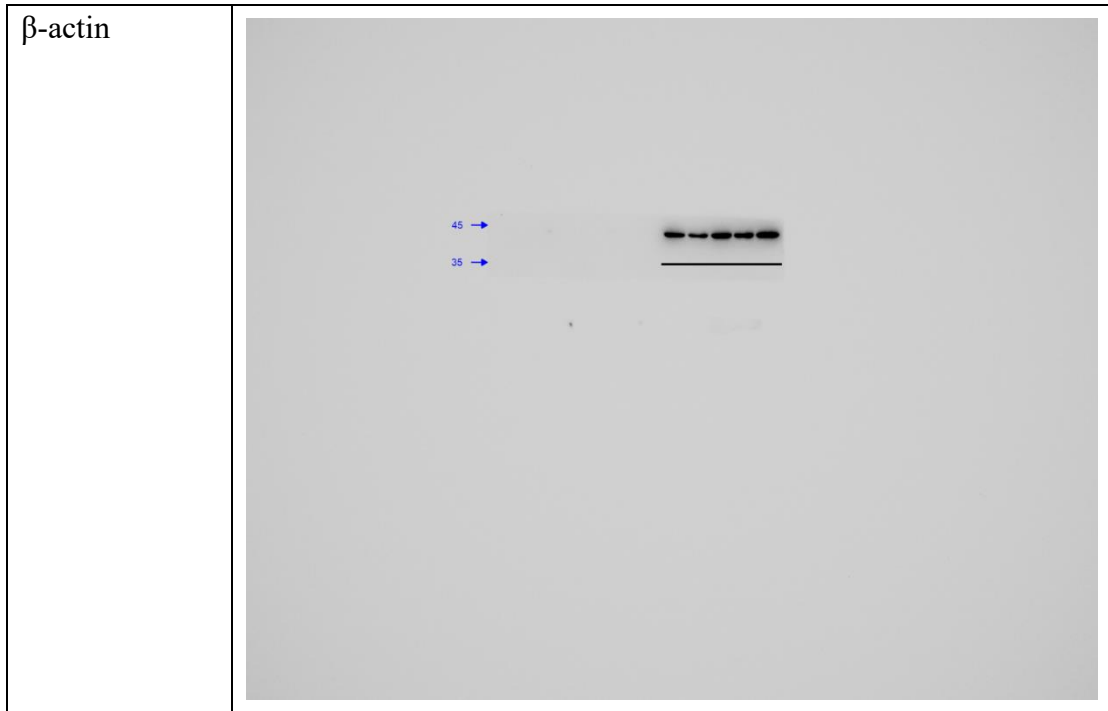

The original figures of immunofluorescent staining in figure 5.

FIGURE 5E

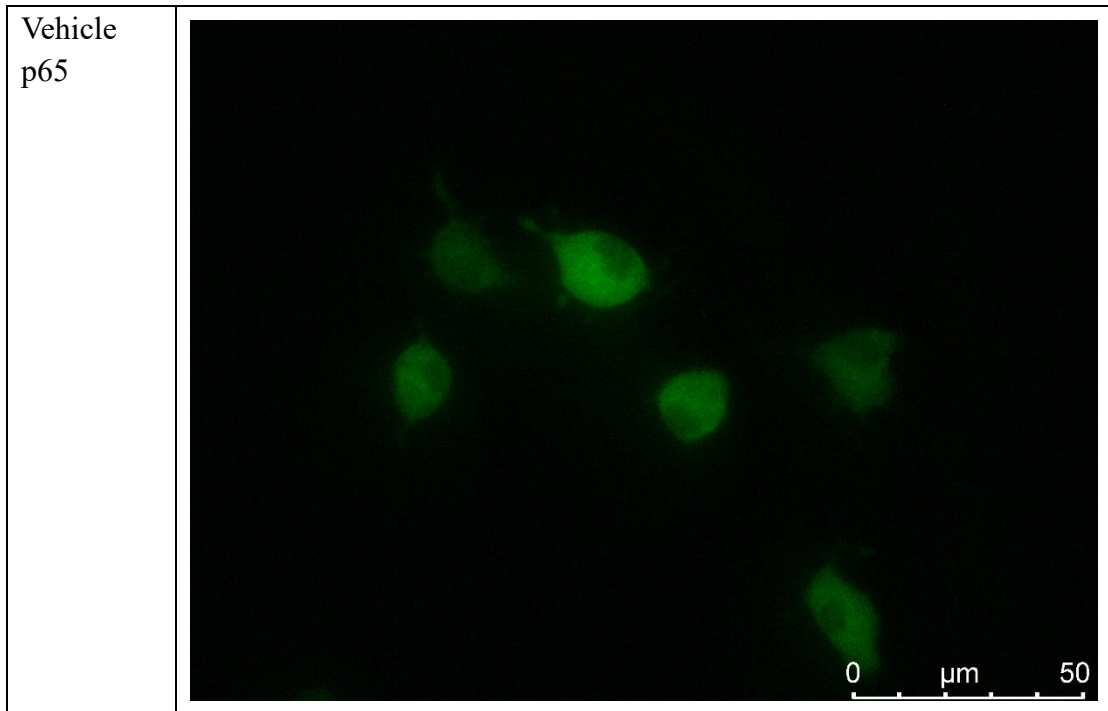

Vehicle  
Hoechst

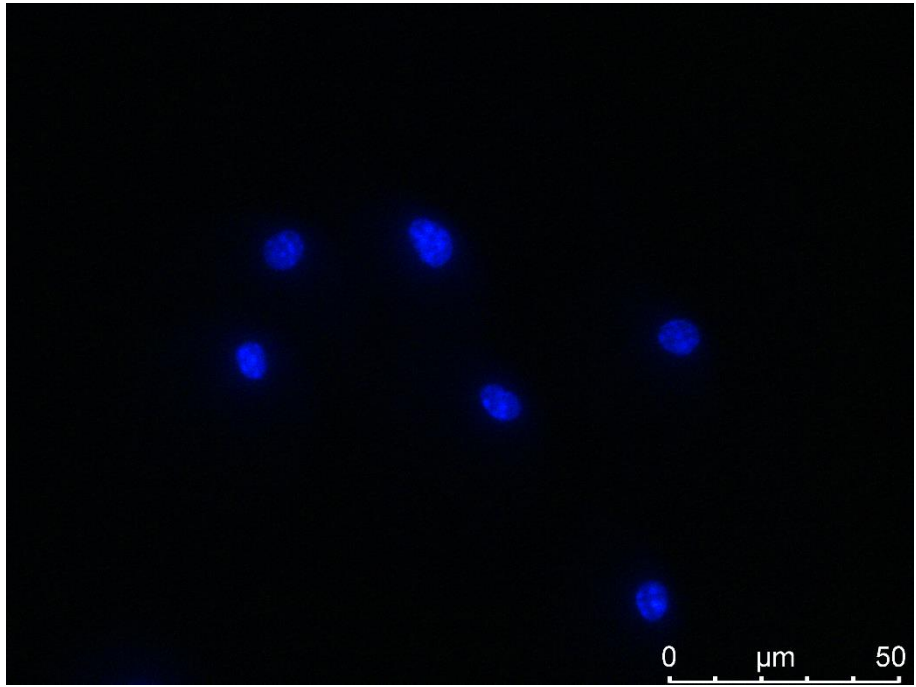

Vehicle  
Merge

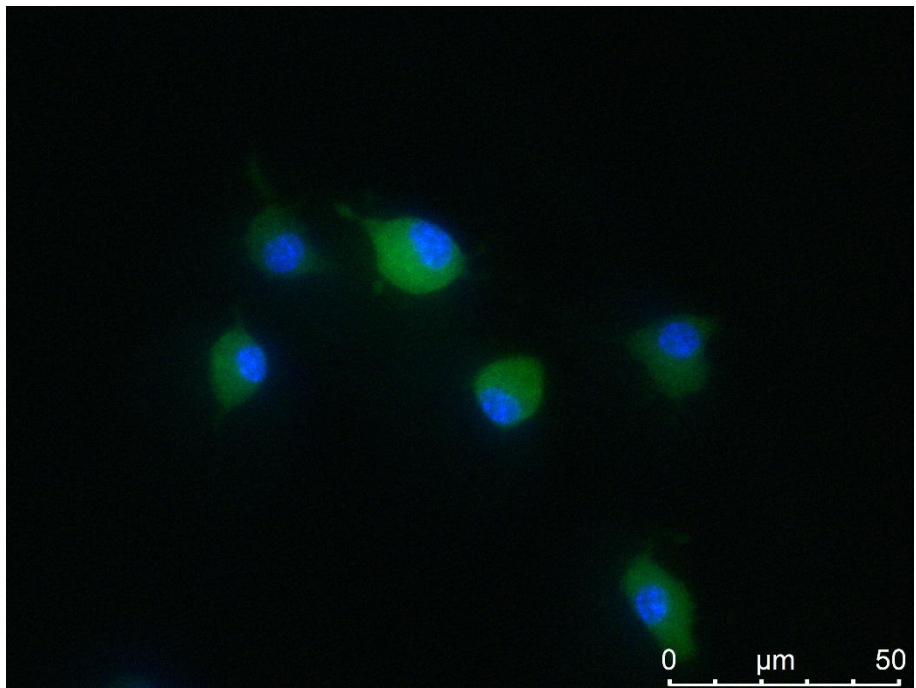

LPS P65

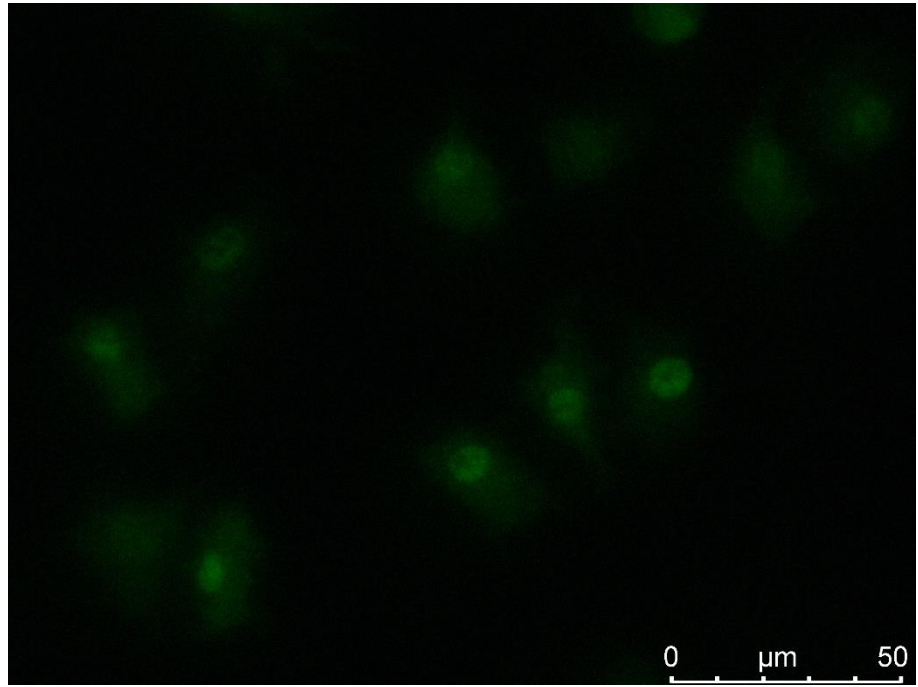

LPS  
Hoechst

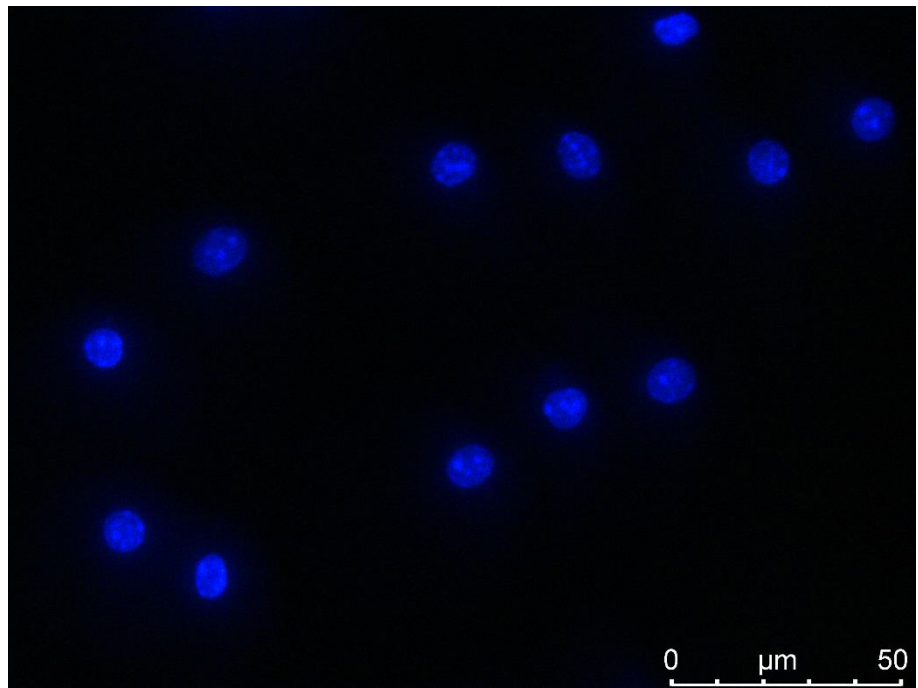

LPS  
Merge

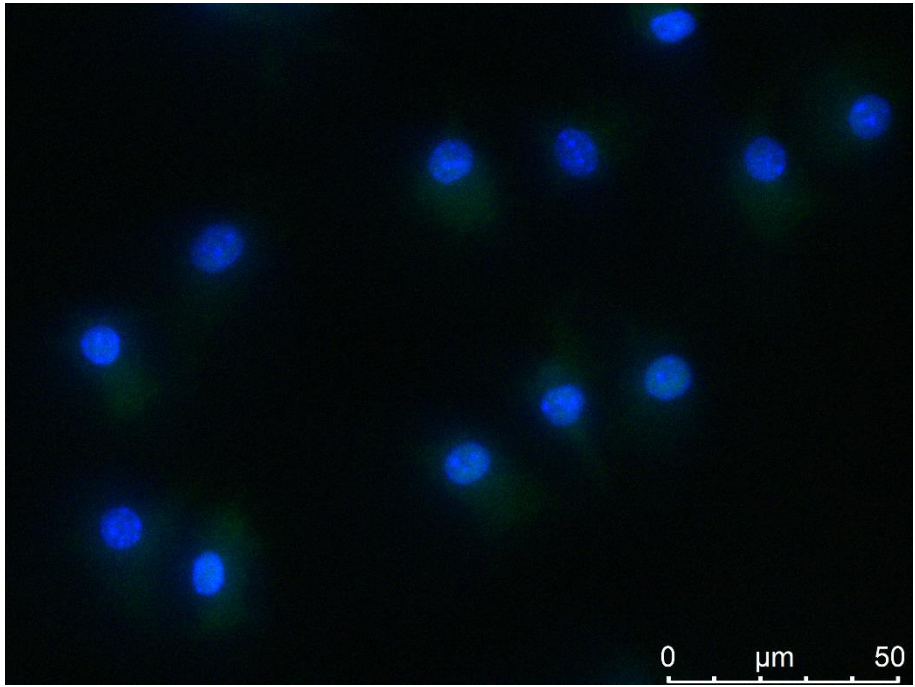

KM+LPS  
p65

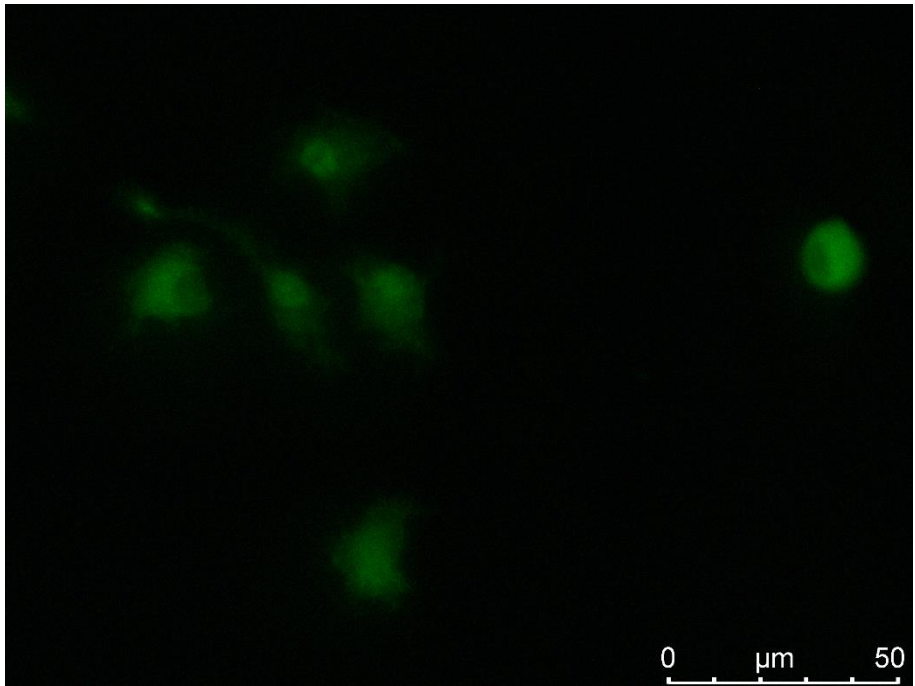

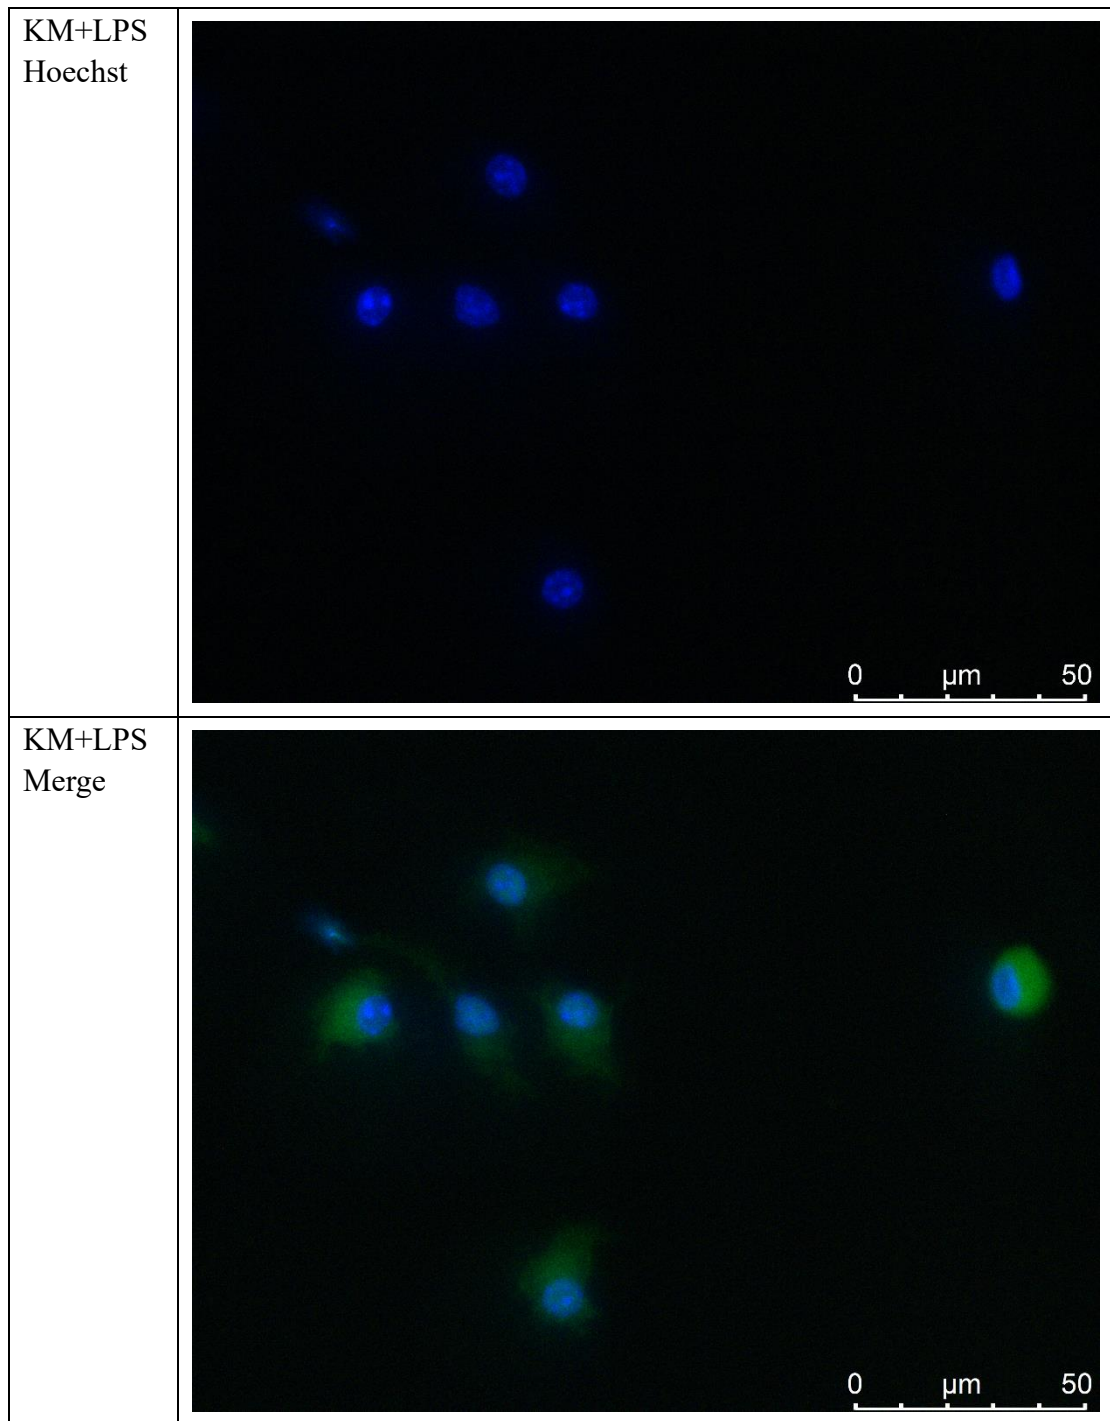

The original figures of immunofluorescent staining in figure 6.

FIGURE 6A

Vehicle ASC

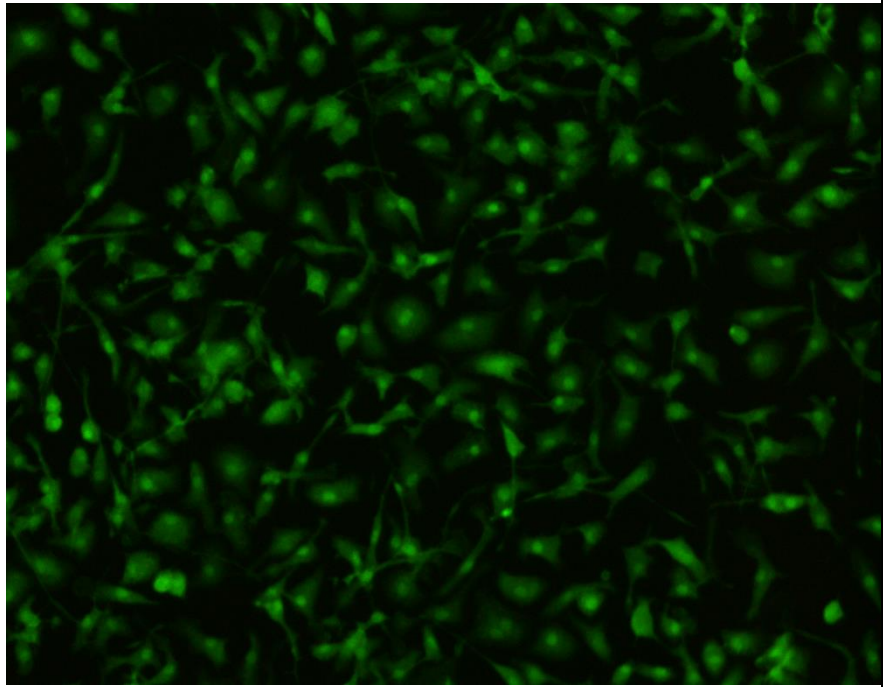

Vehicle  
Hoechst

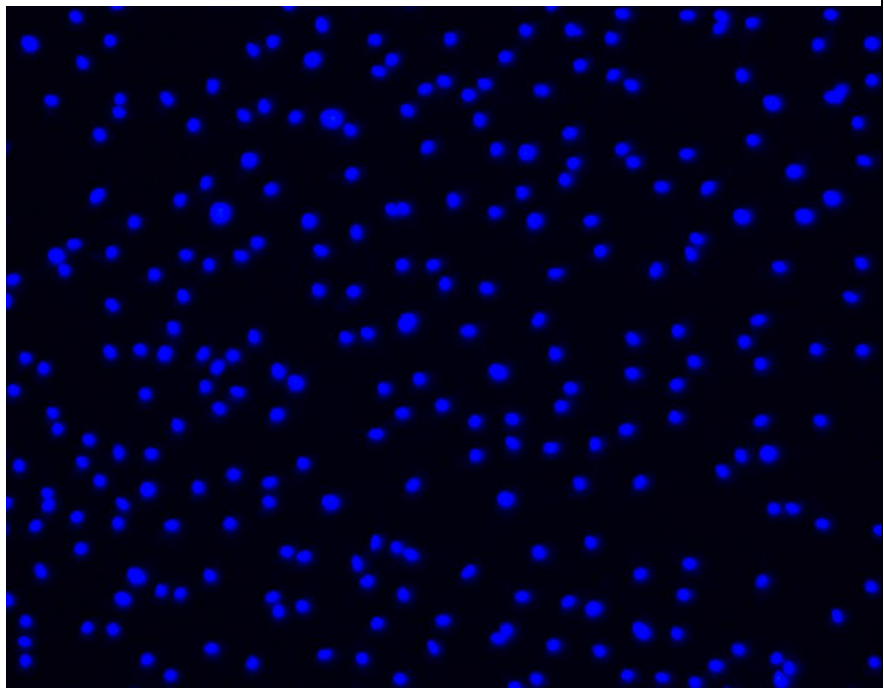

Vehicle Merge

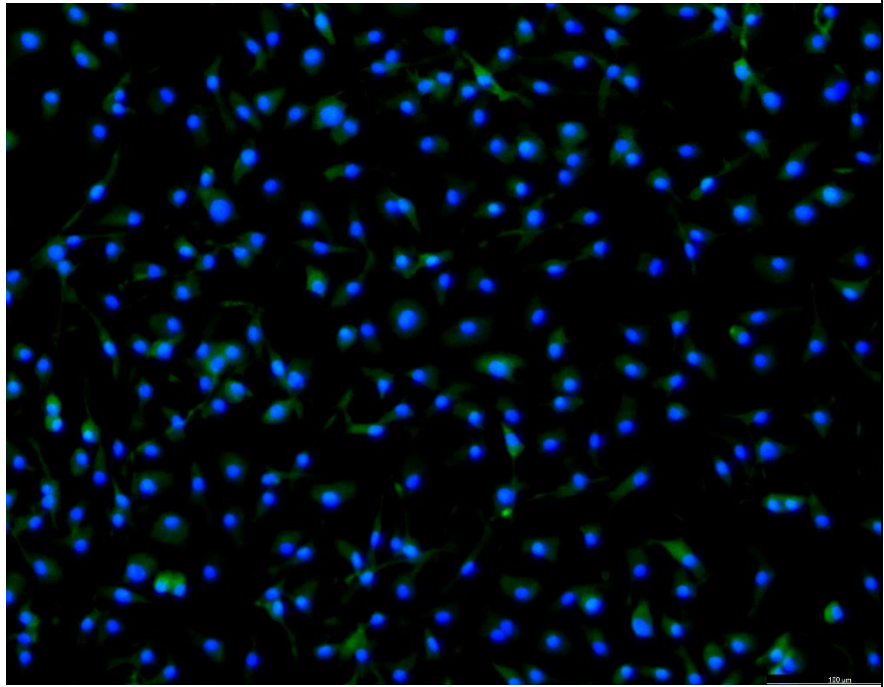

LPS+ATP  
ASC

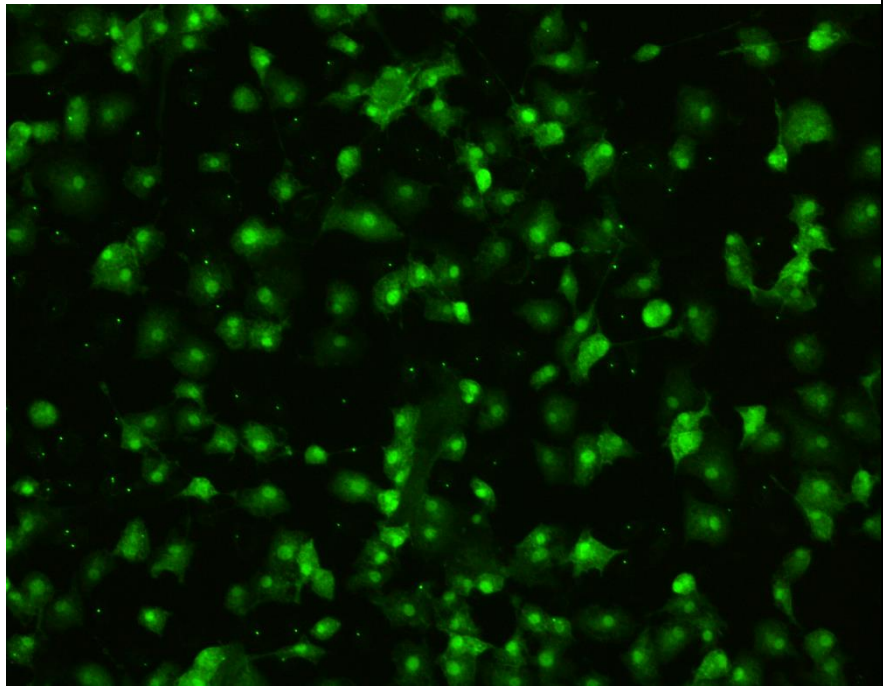

LPS+ATP  
Hoechst

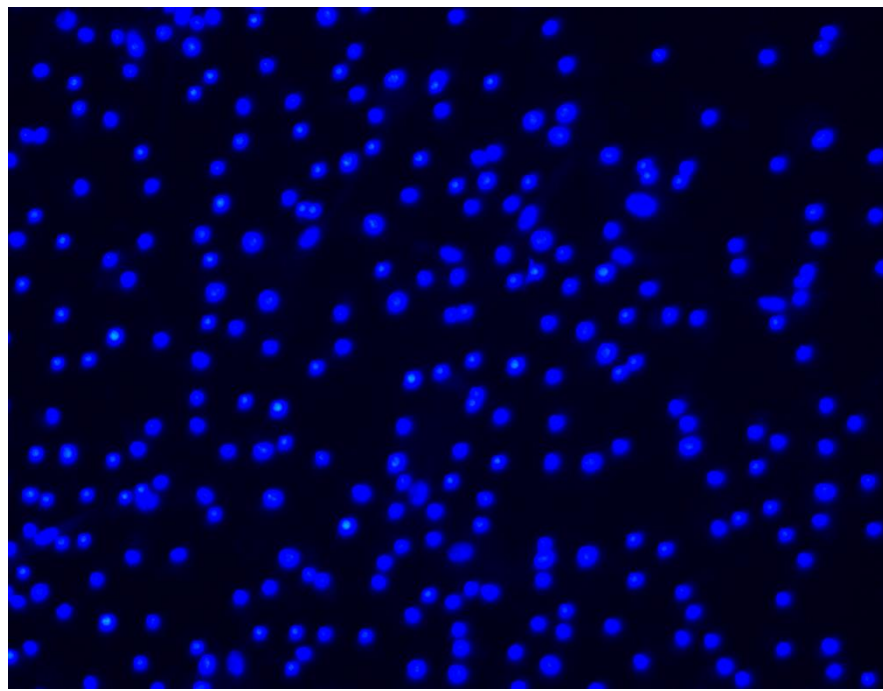

LPS+ATP  
Merge

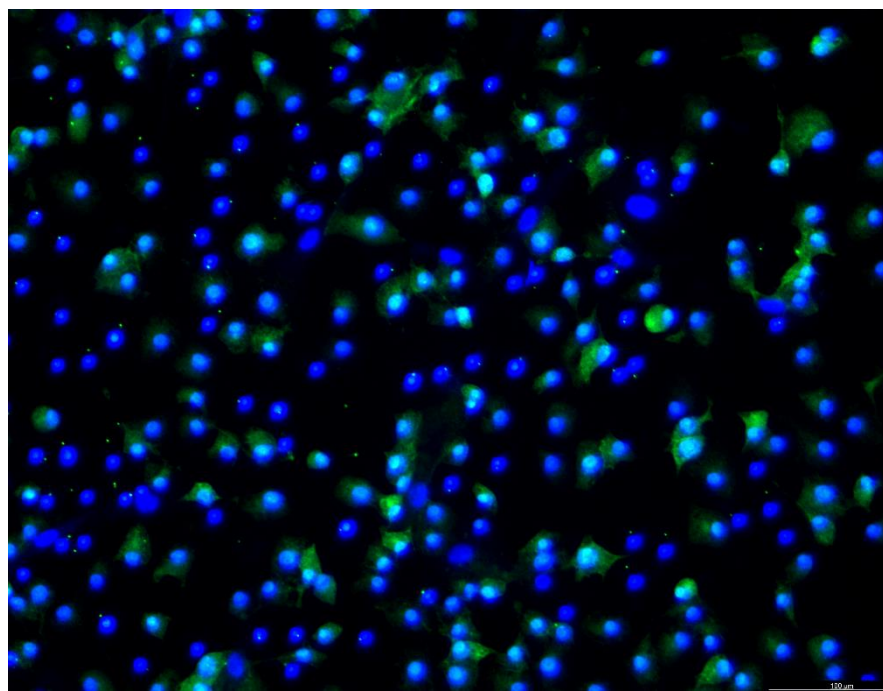



KM+LPS+AT  
P ASC

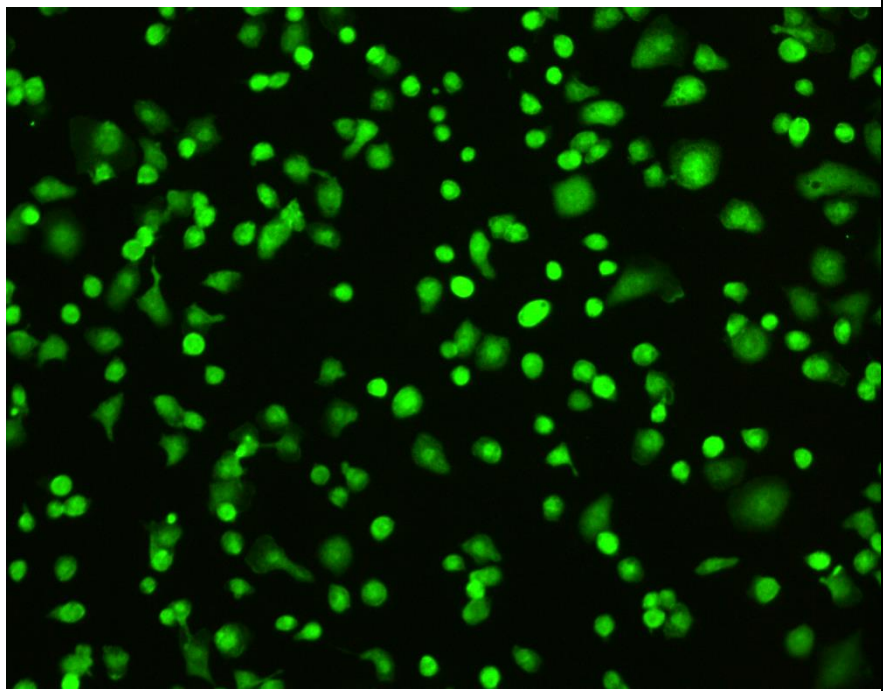

KM+LPS+AT  
P Hoechst

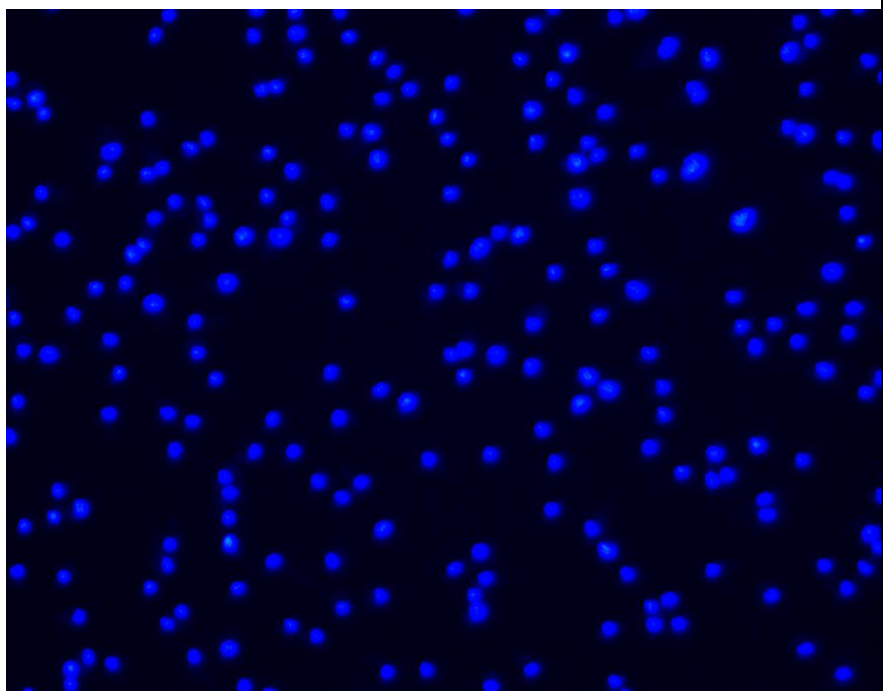

KM+LPS+AT  
P Merge

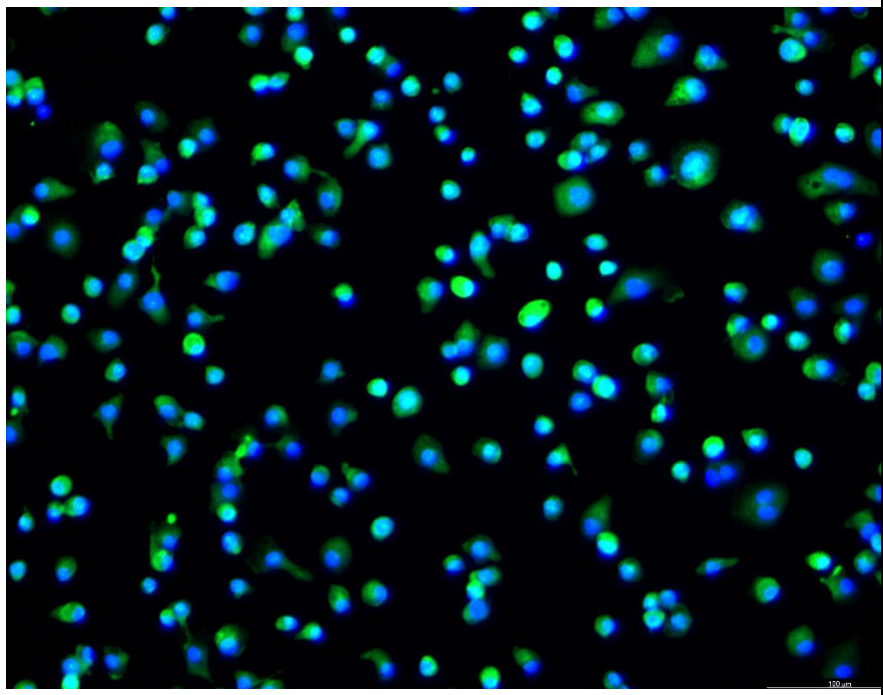

FIGURE 6D

Vehicle  
NLRP3

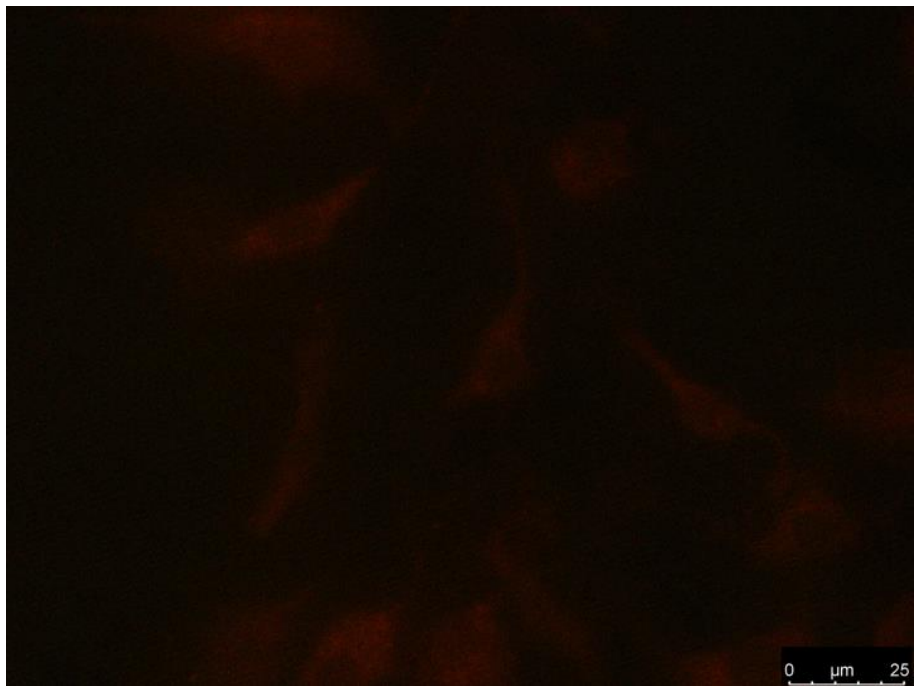

Vehicle  
ASC

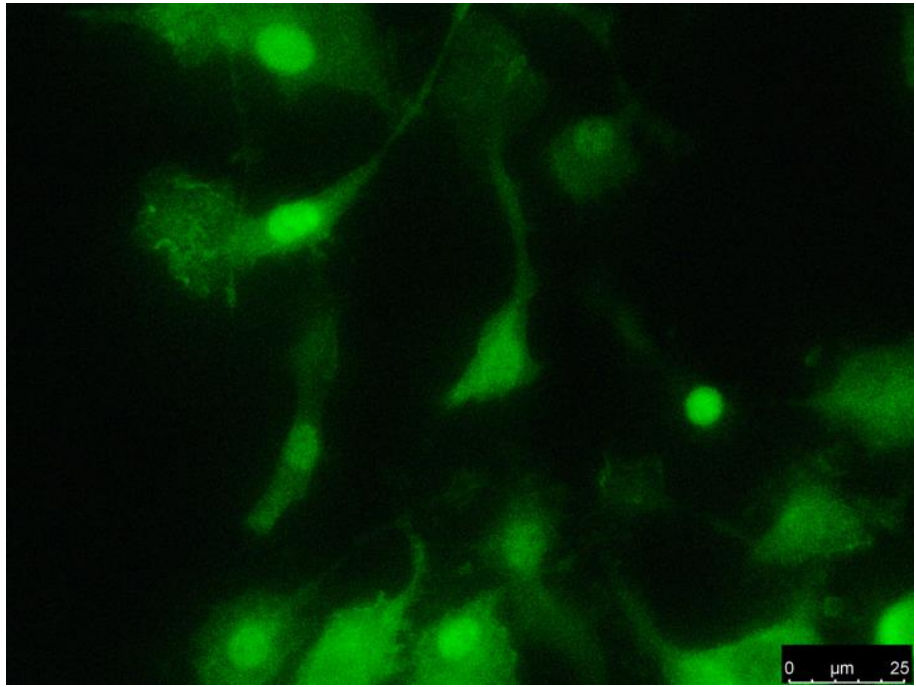

Vehicle  
Hoechst

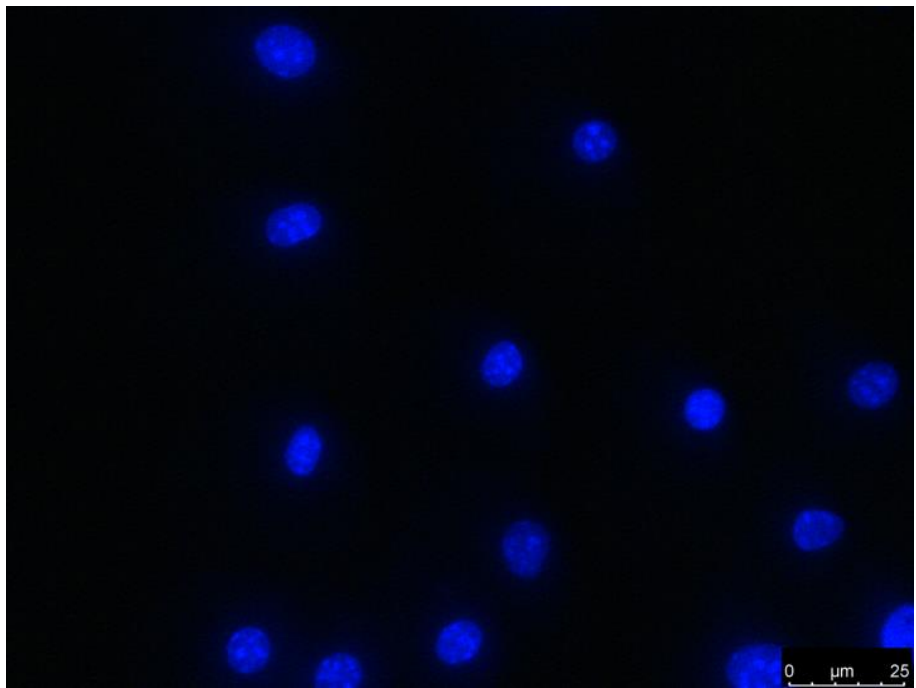

Vehicle  
Merge

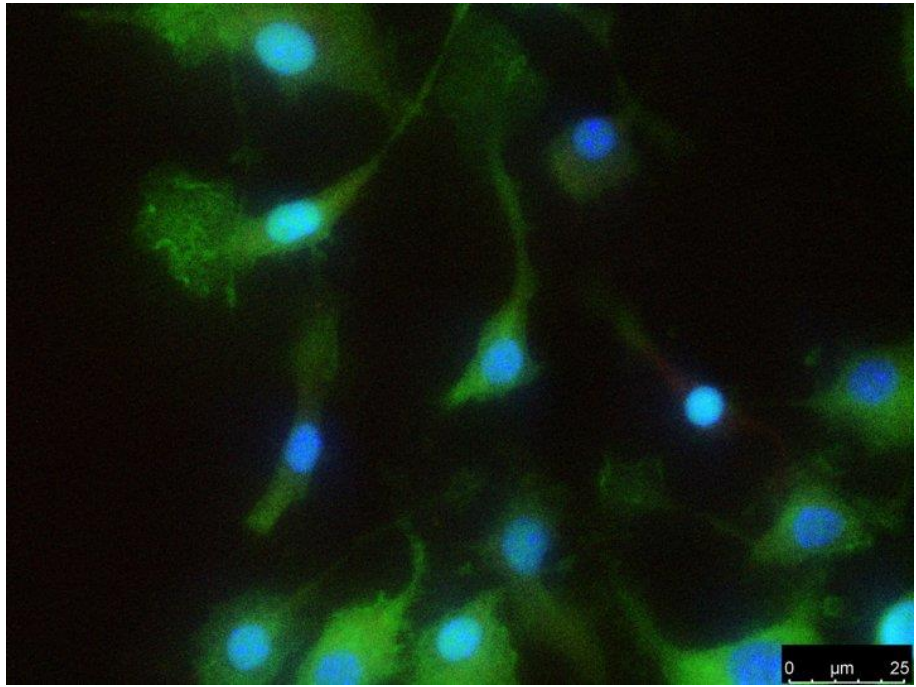

LPS+ATP  
NLRP3

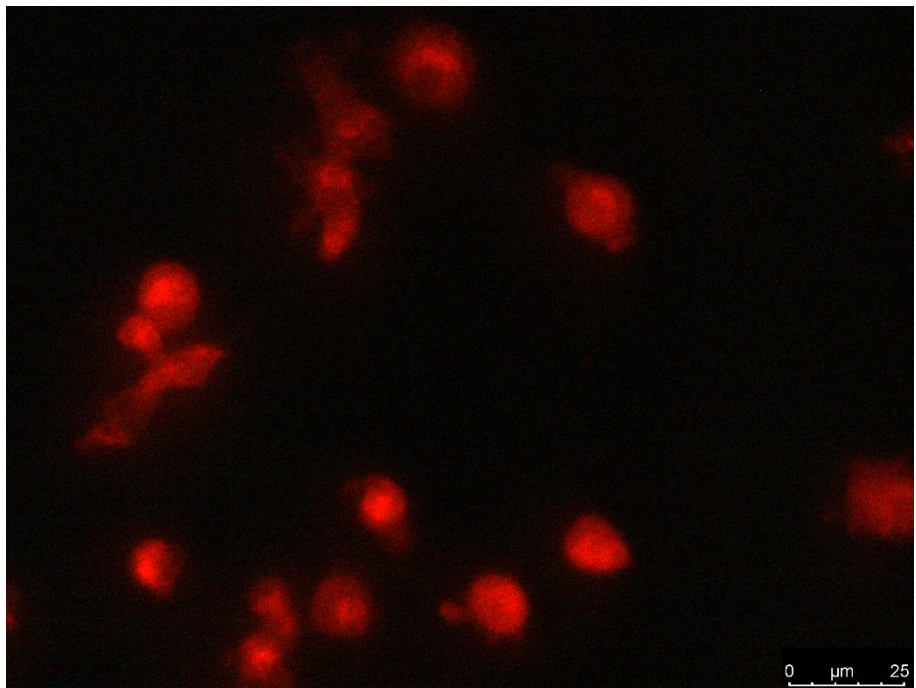

LPS+ATP  
ASC

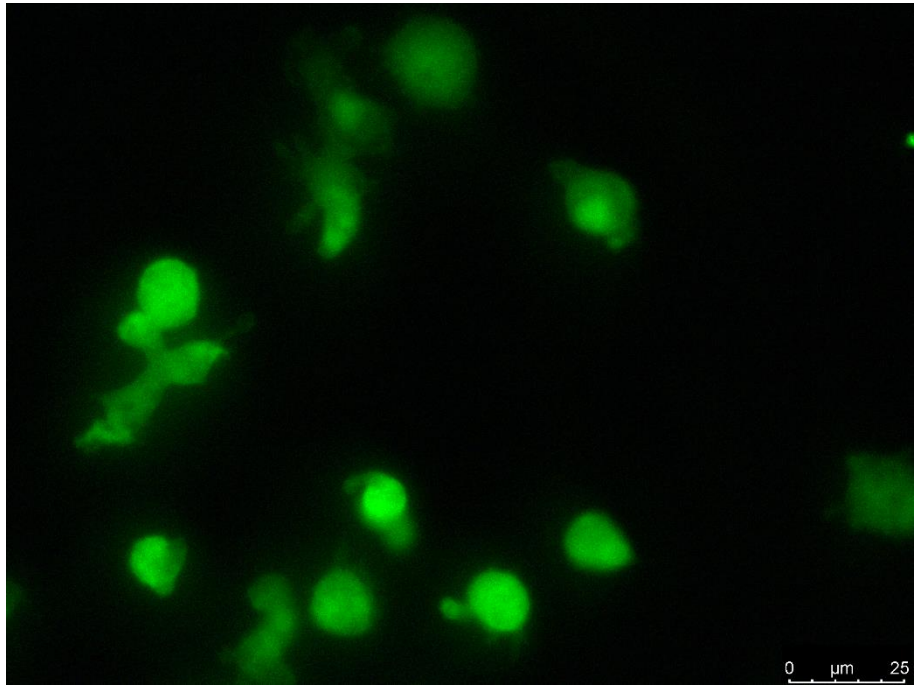

LPS+ATP  
Hoechst

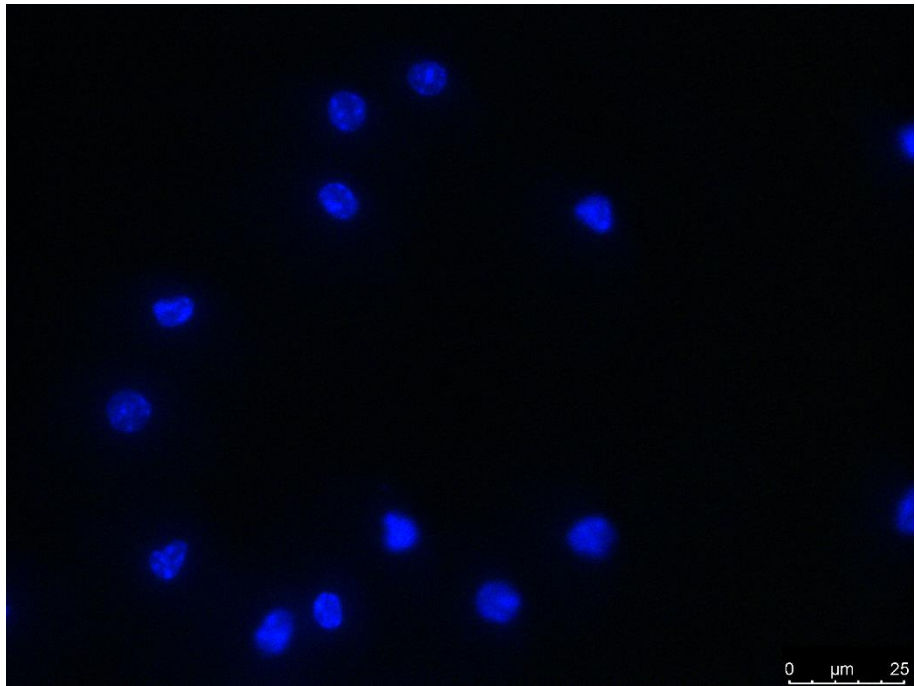

LPS+ATP  
Merge

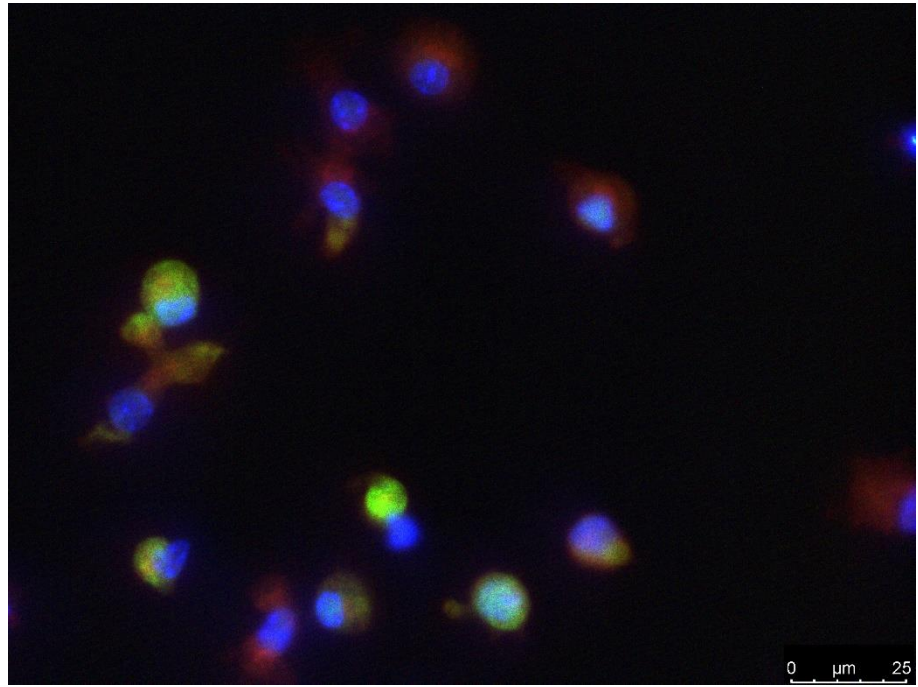

KM+  
LPS+ATP  
NLRP3

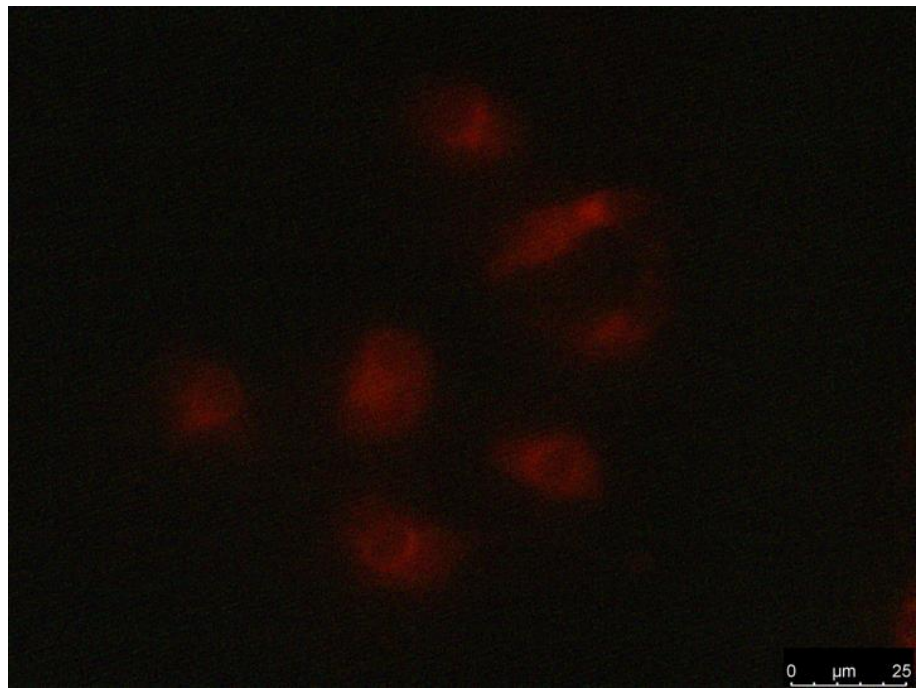

KM+  
LPS+ATP  
ASC

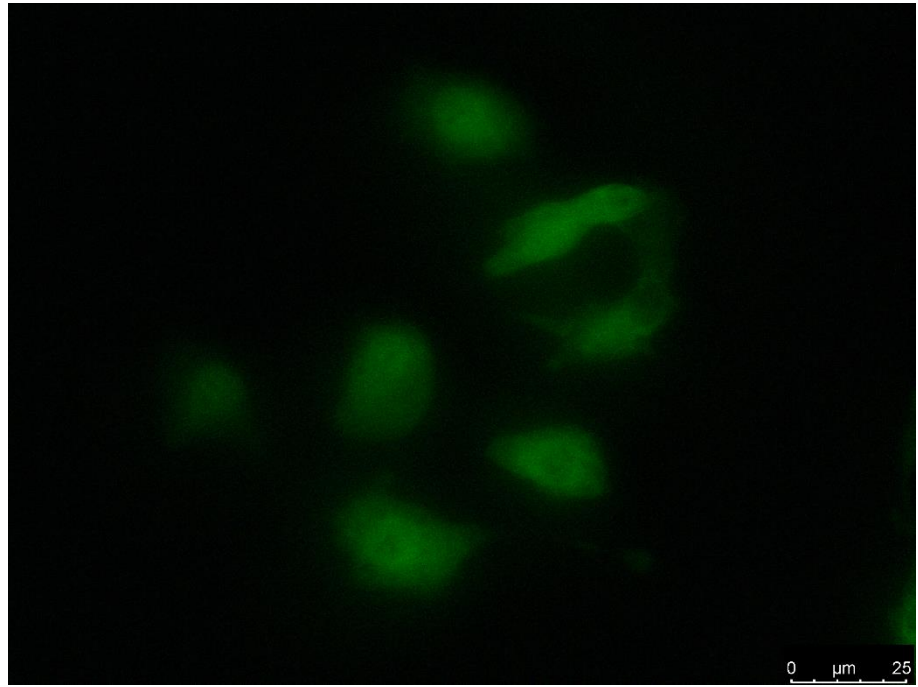

KM+  
LPS+ATP  
Hoechst

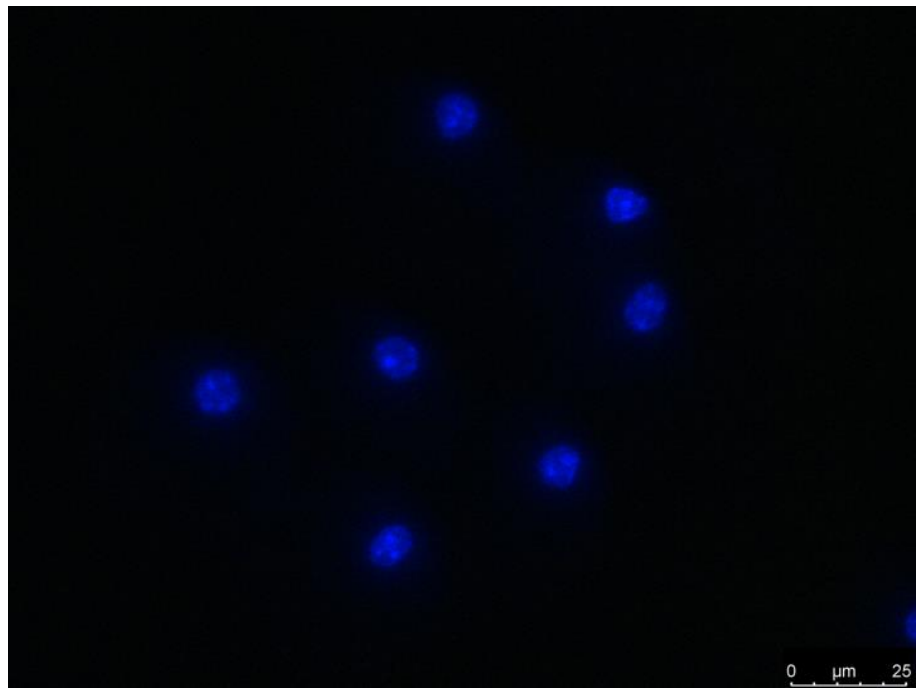

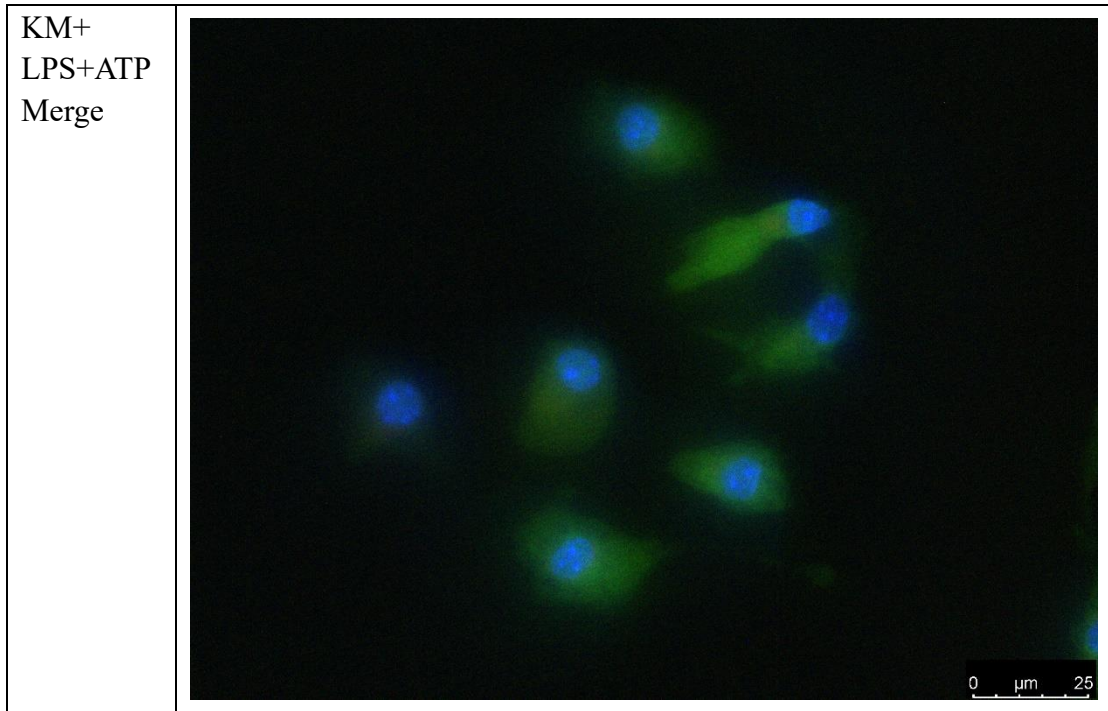

The original western blots of figure 6.

FIGURE 6C

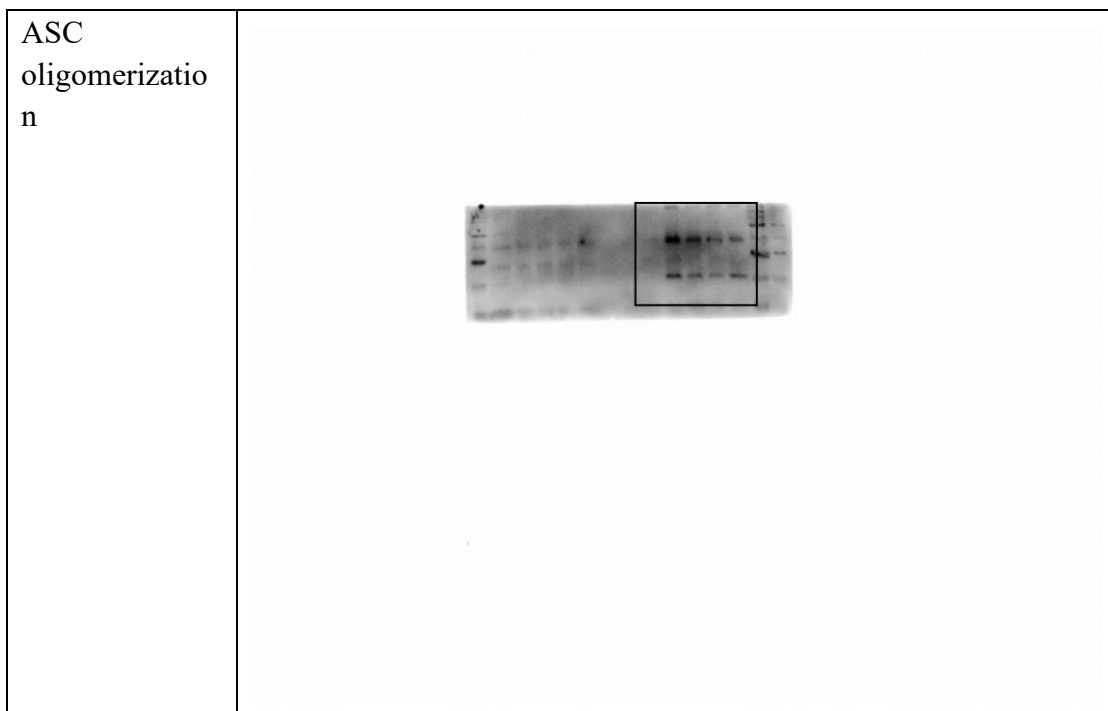



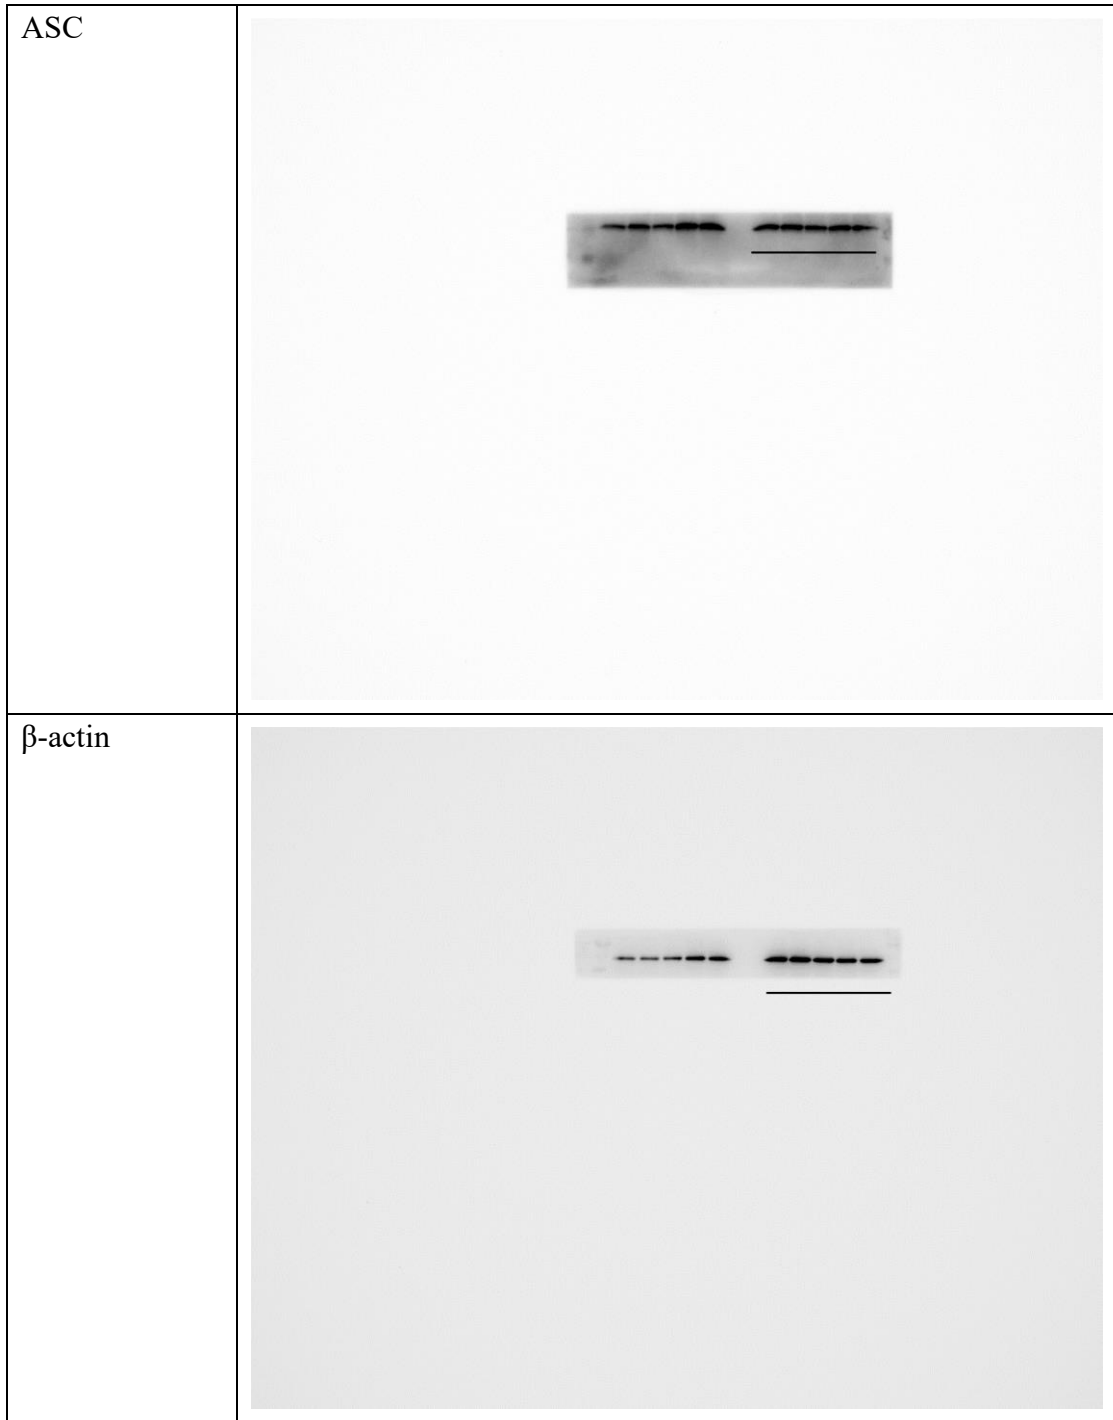

FIGURE 6E

IP-NLRP3

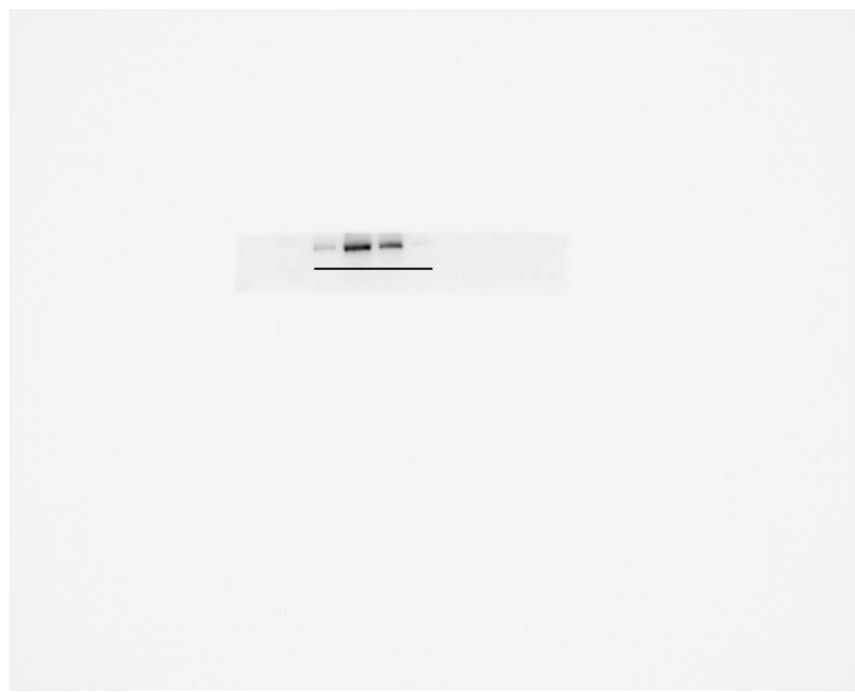

IP-pro-caspase-1

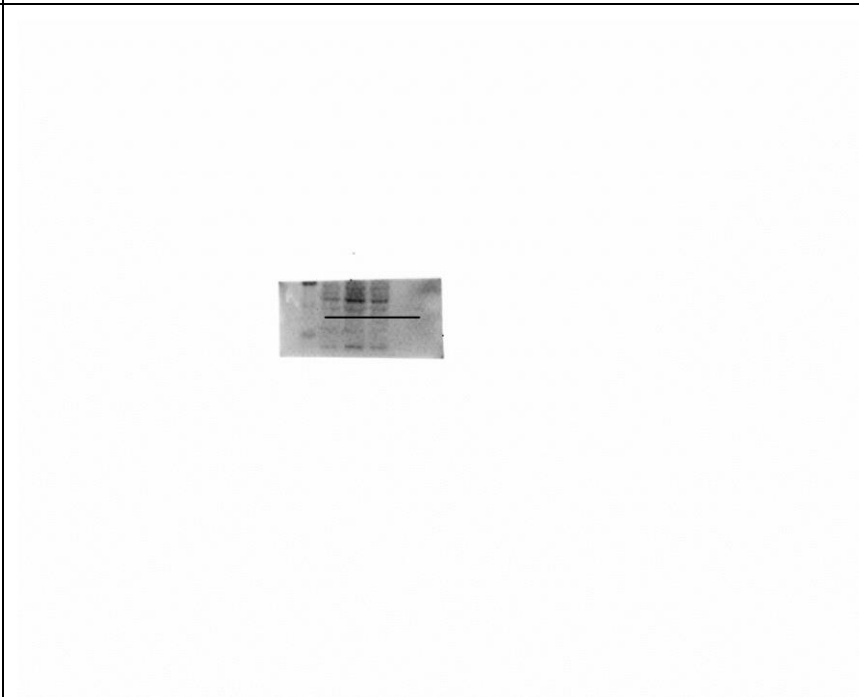

IP-ASC

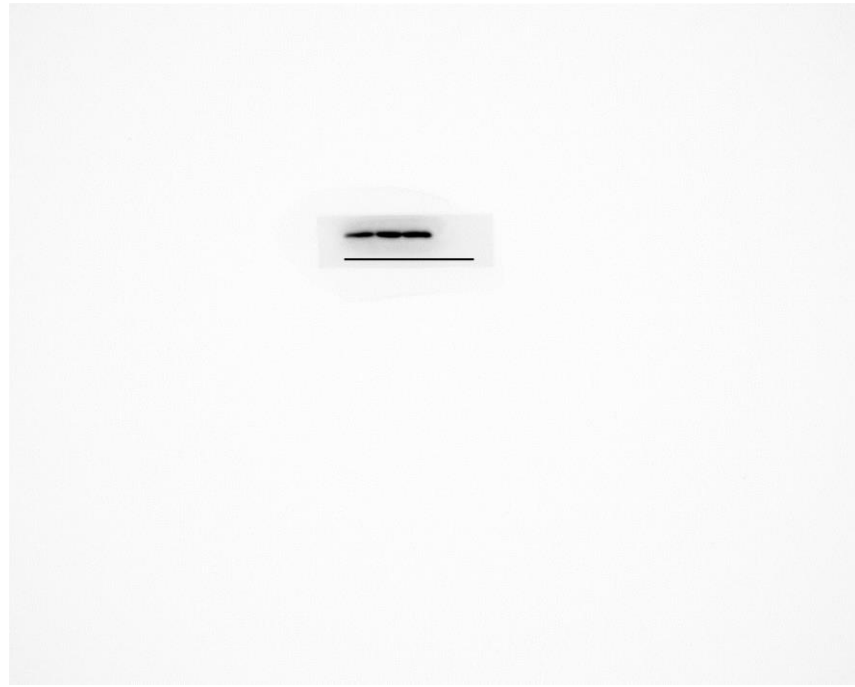

Input-  
NLRP3

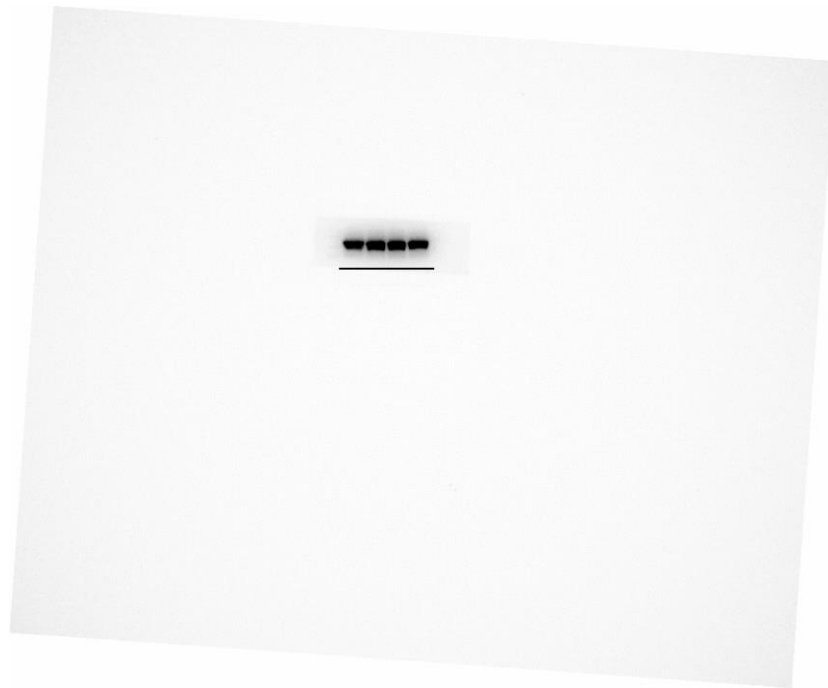

Input-pro-caspase-1

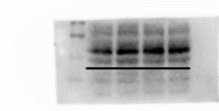

Input-ASC

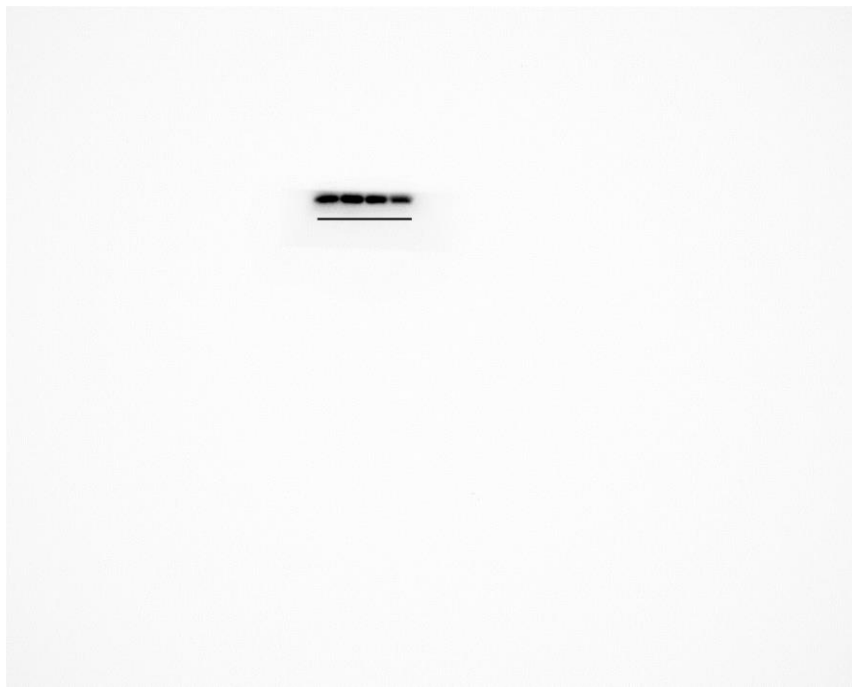

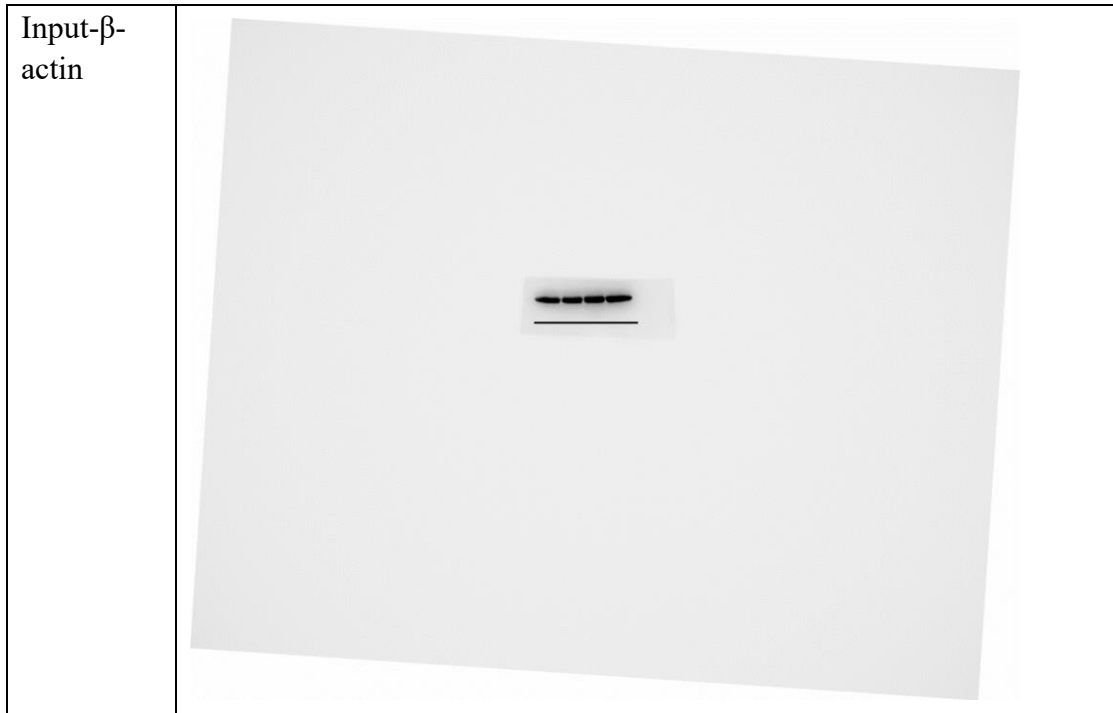

The original figures of DCFH-DA staining in figure 7.

FIGURE 7A

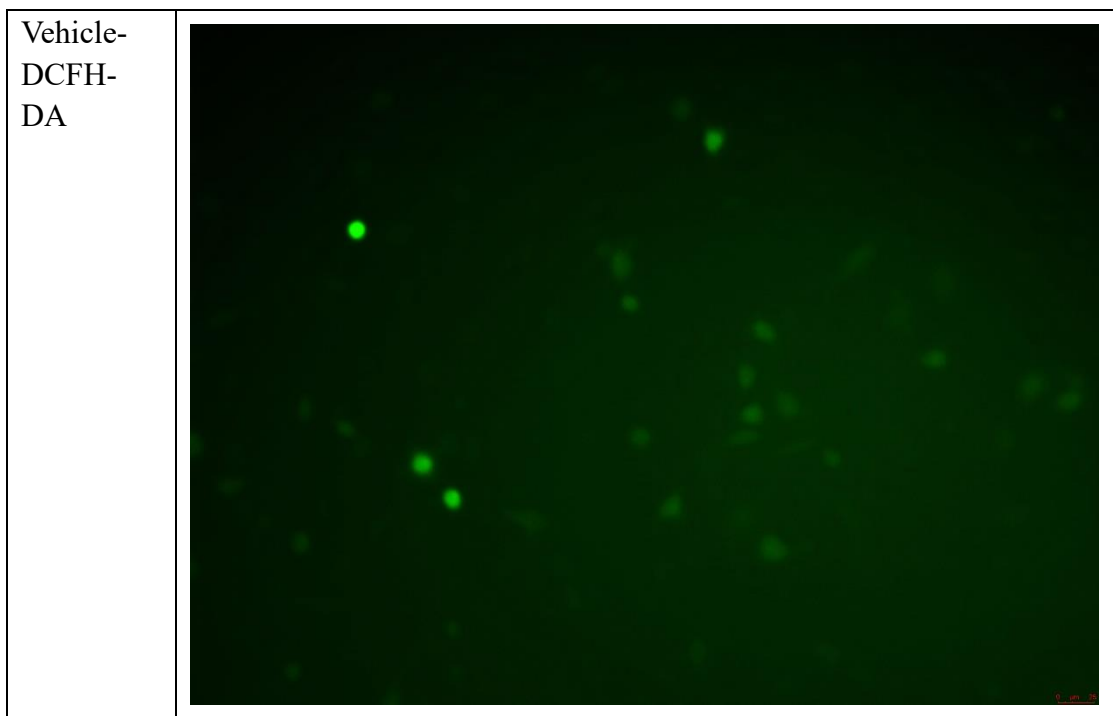

Vehicle-  
Hoechst

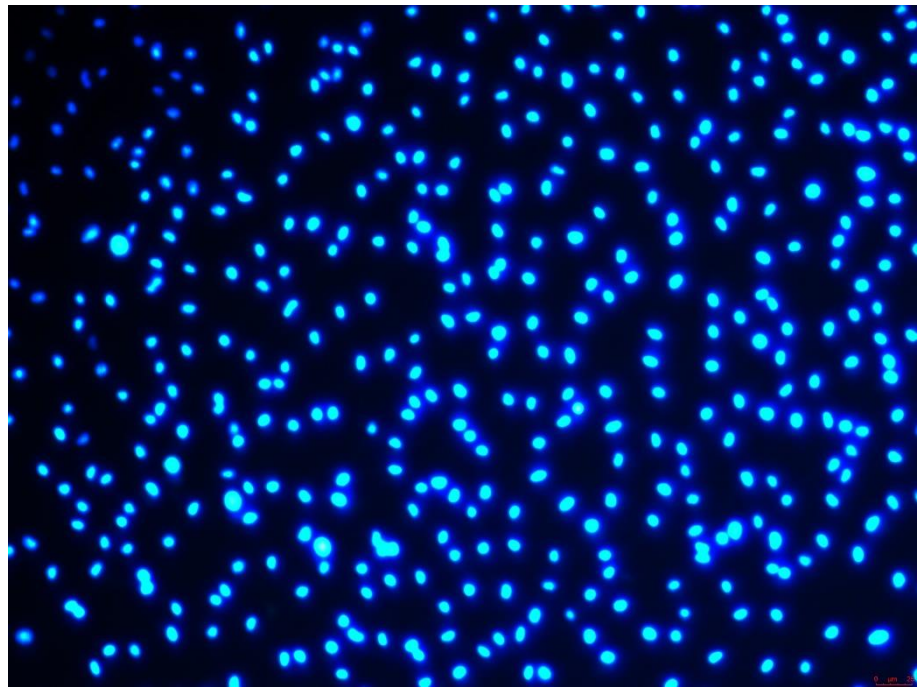

LPS+ATP-  
DCFH-  
DA

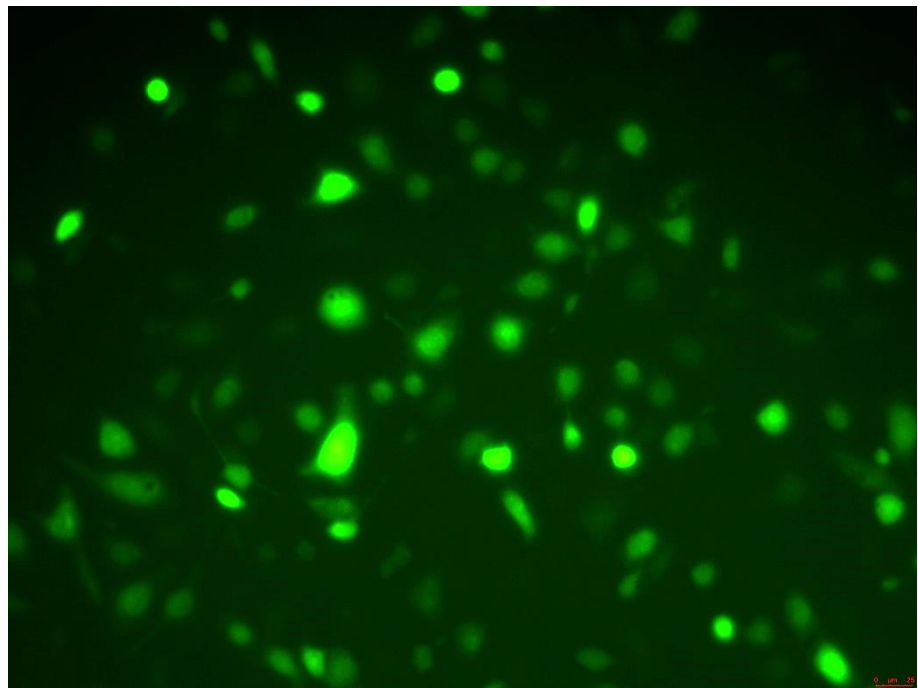

LPS+ATP  
-Hoechst

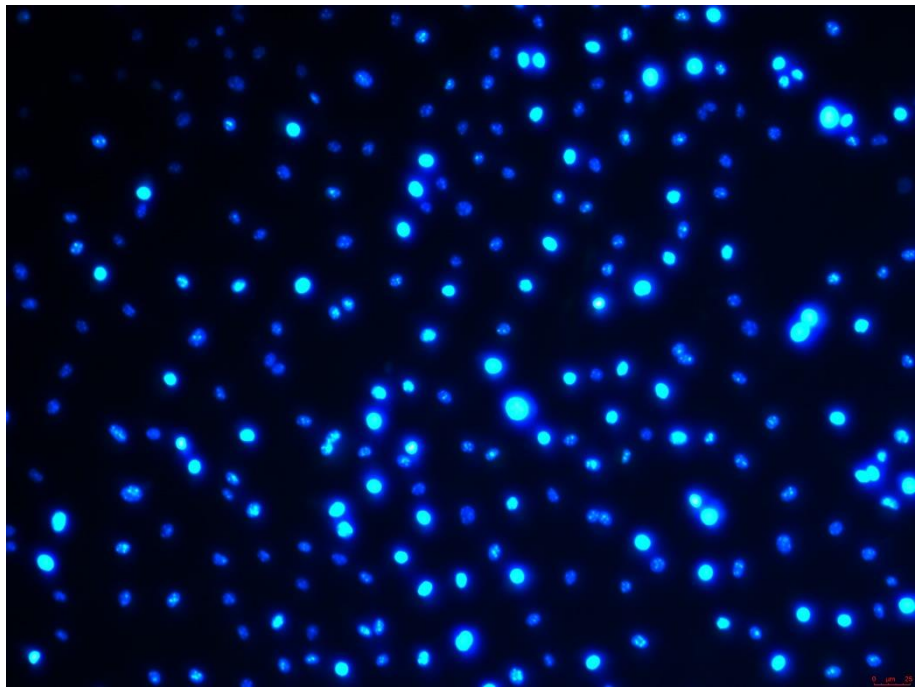

KM 50  
 $\mu$ M-  
DCFH-  
DA

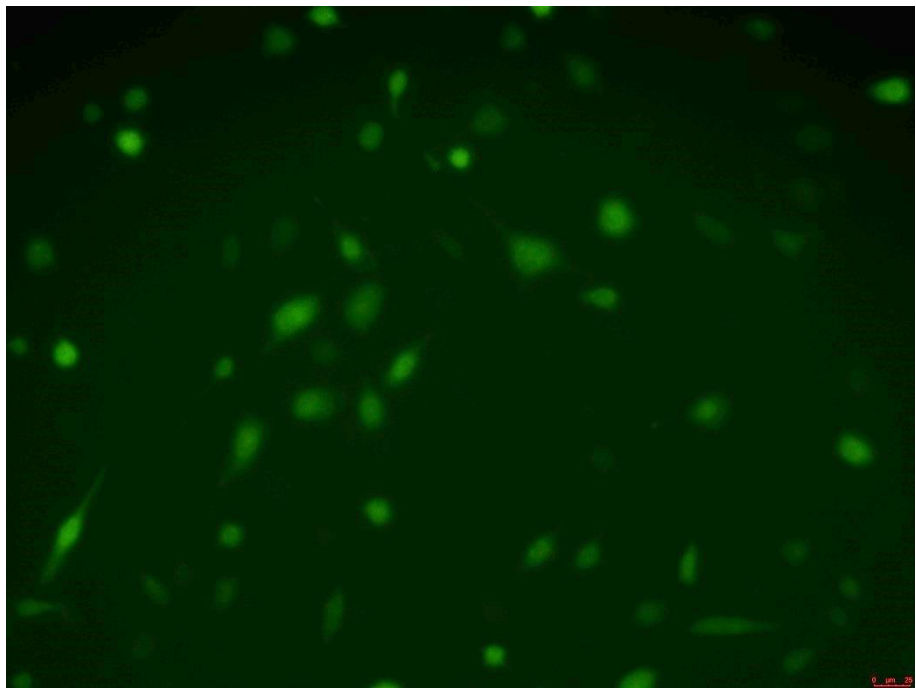

KM 50  
 $\mu$ M-  
Hoechst

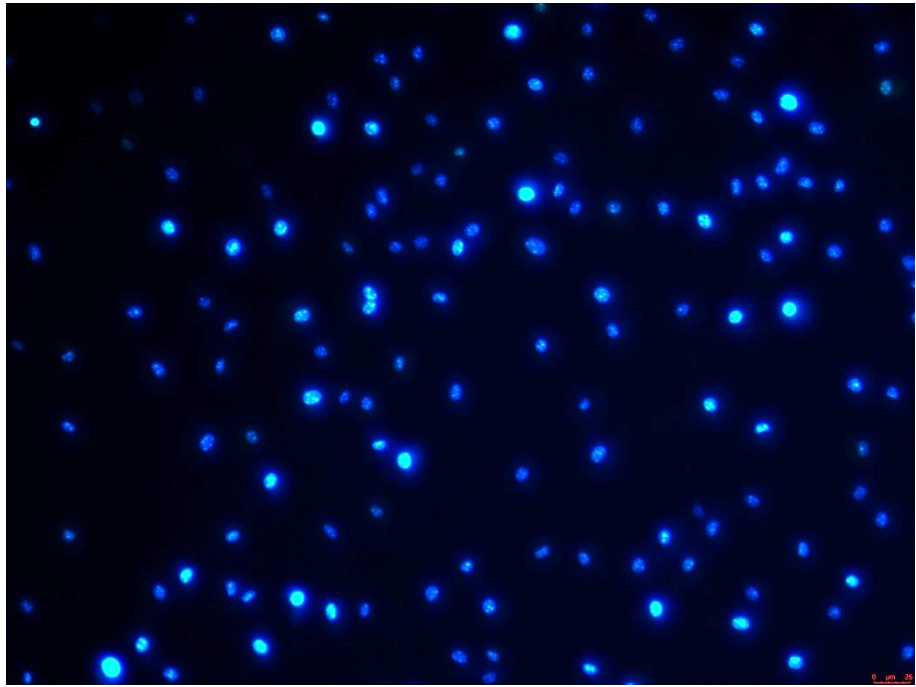

KM 100  
 $\mu$ M-  
DCFH-  
DA

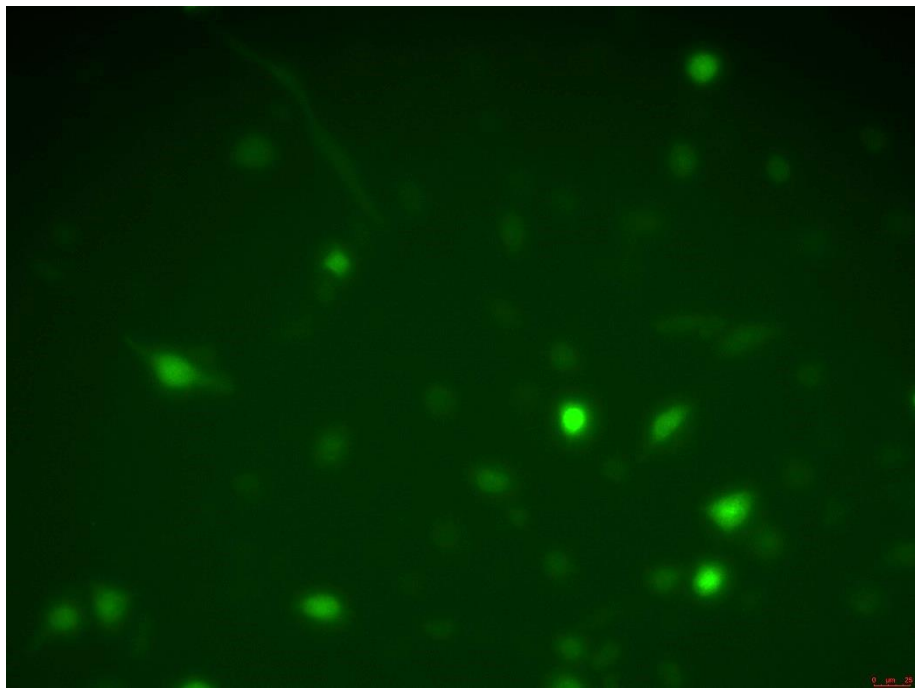



KM 100  
 $\mu$ M-  
Hoechst

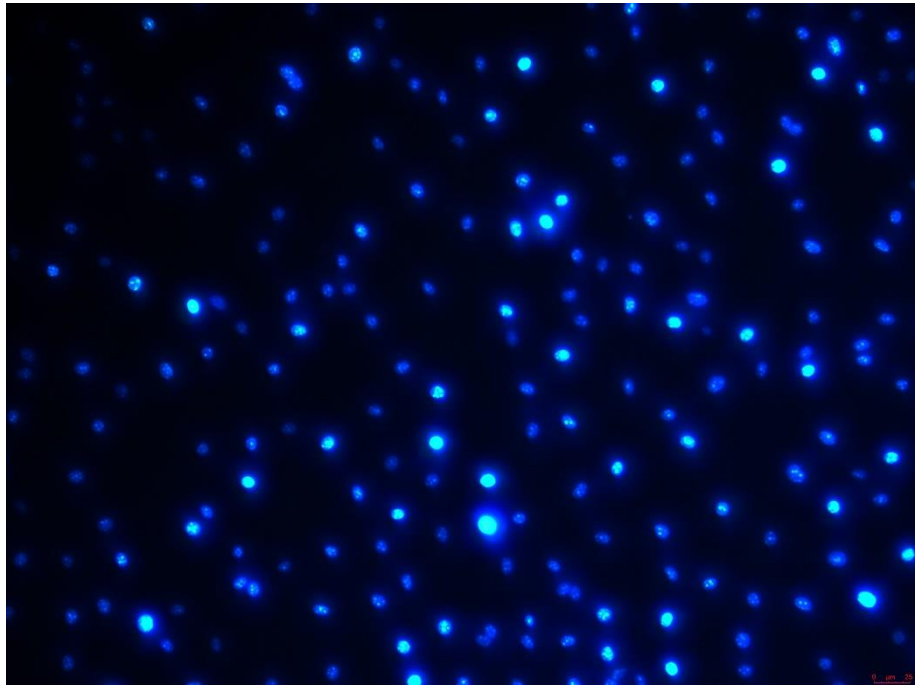

KM 200  
 $\mu$ M-  
DCFH-  
DA

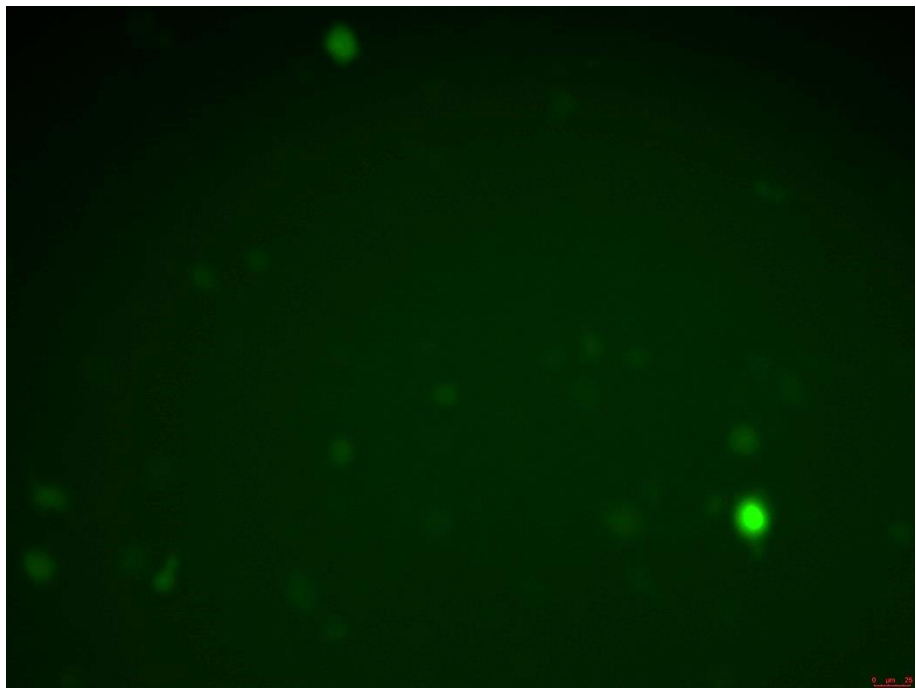

KM 200  
 $\mu$ M-  
Hoechst

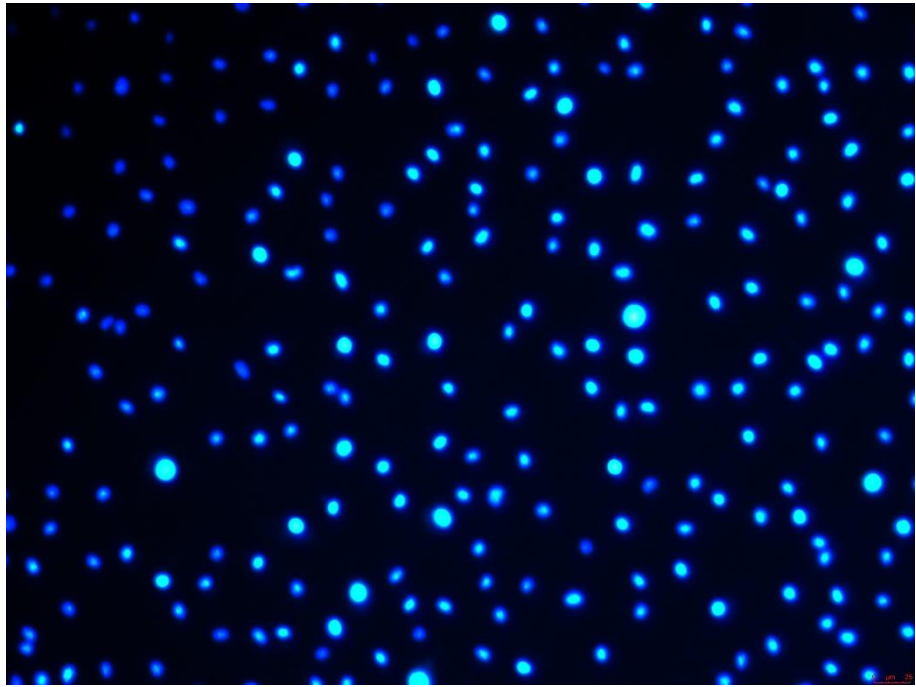

The original western blots of figure 7.

FIGURE 7E

p-AMPK

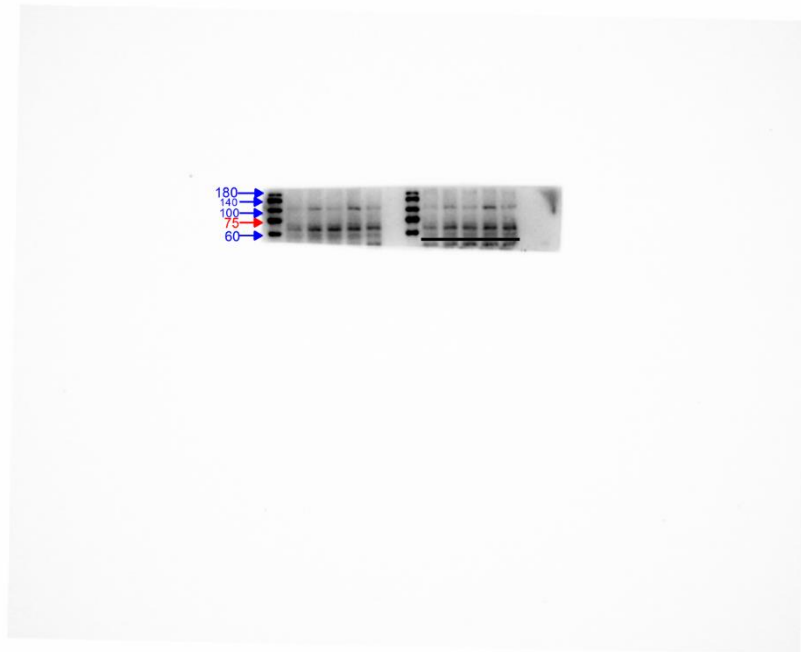

AMPK

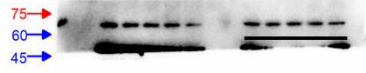

$\beta$ -actin

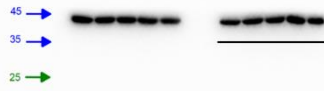

The original figures in supplementary figure 1.

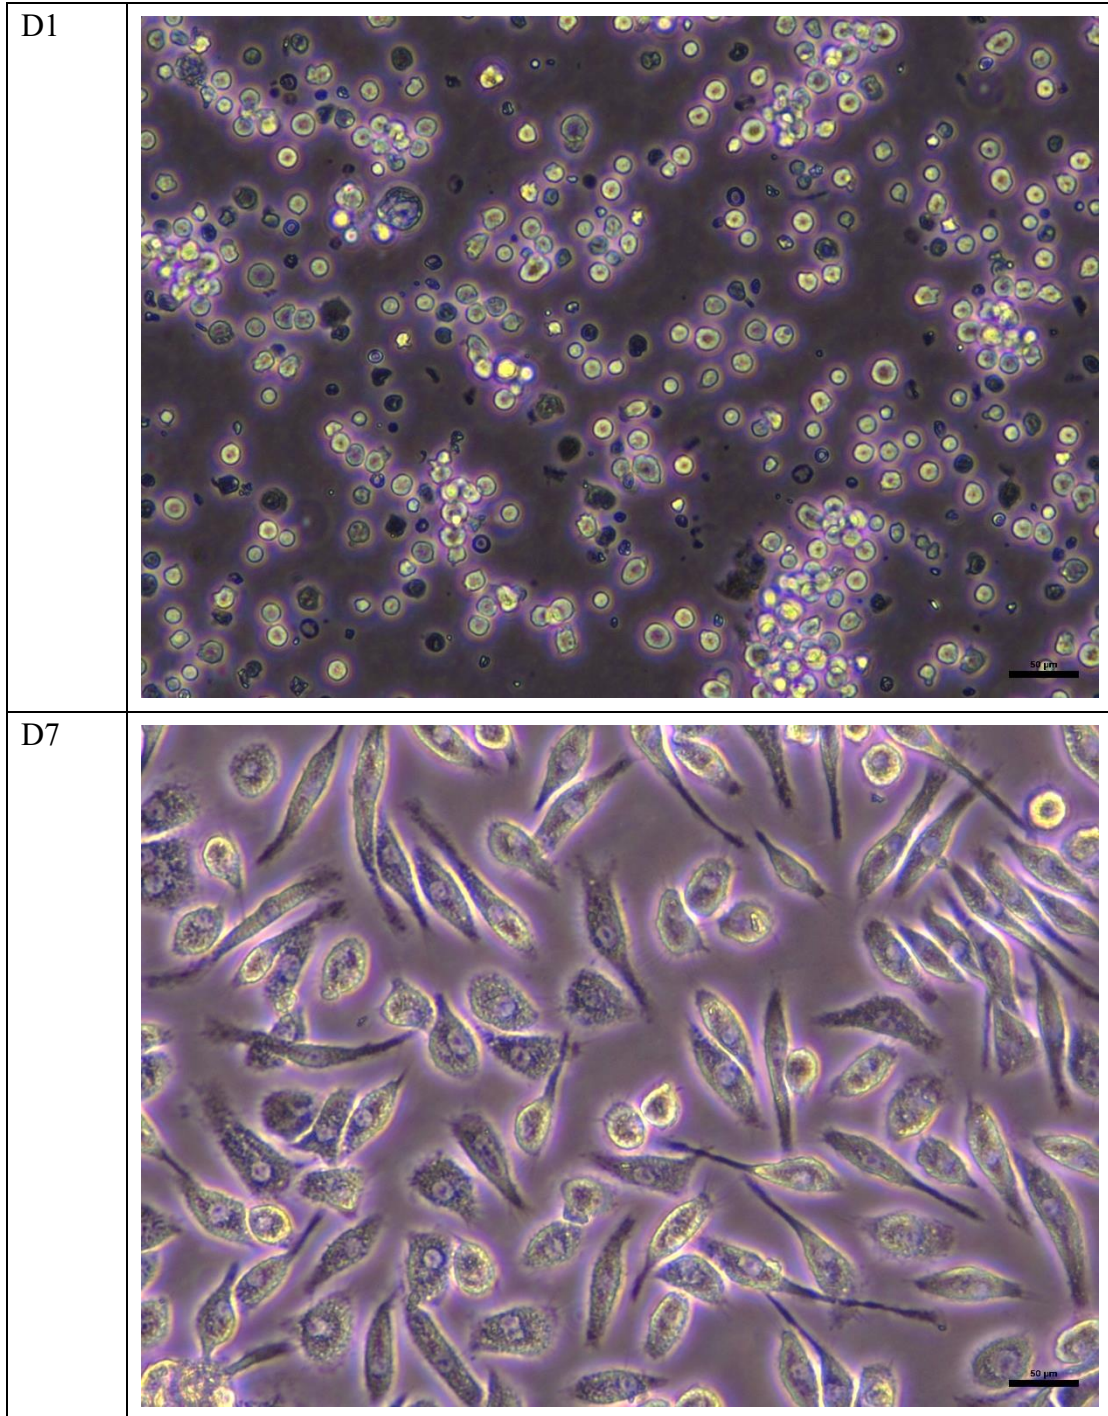

The original western blots of figure S2.

FIGURE S2A BMDM

NLRP3

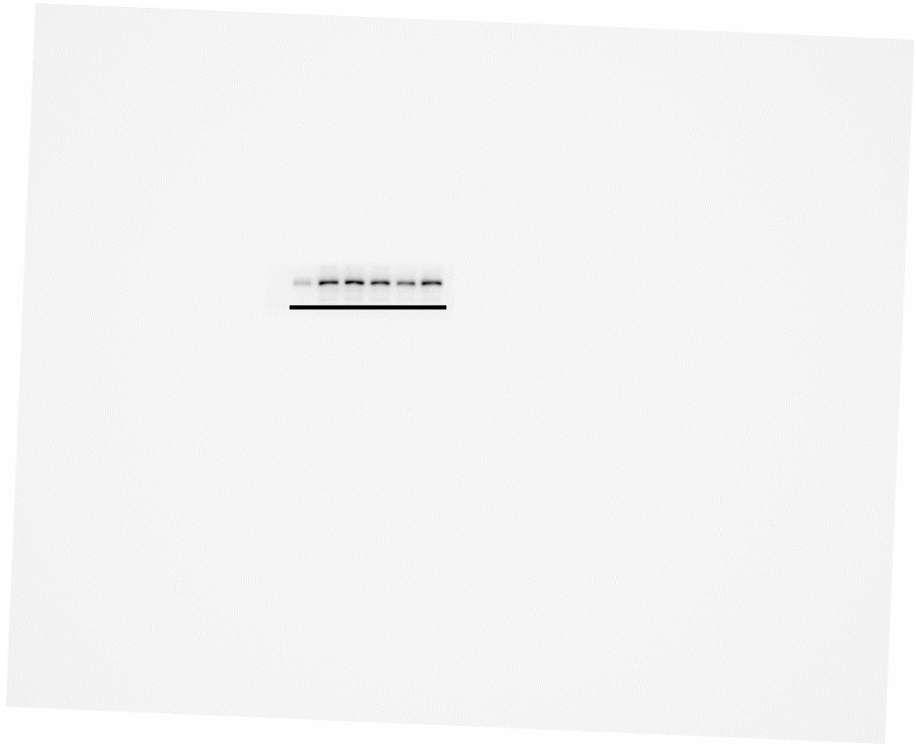

Pro-IL-1 $\beta$

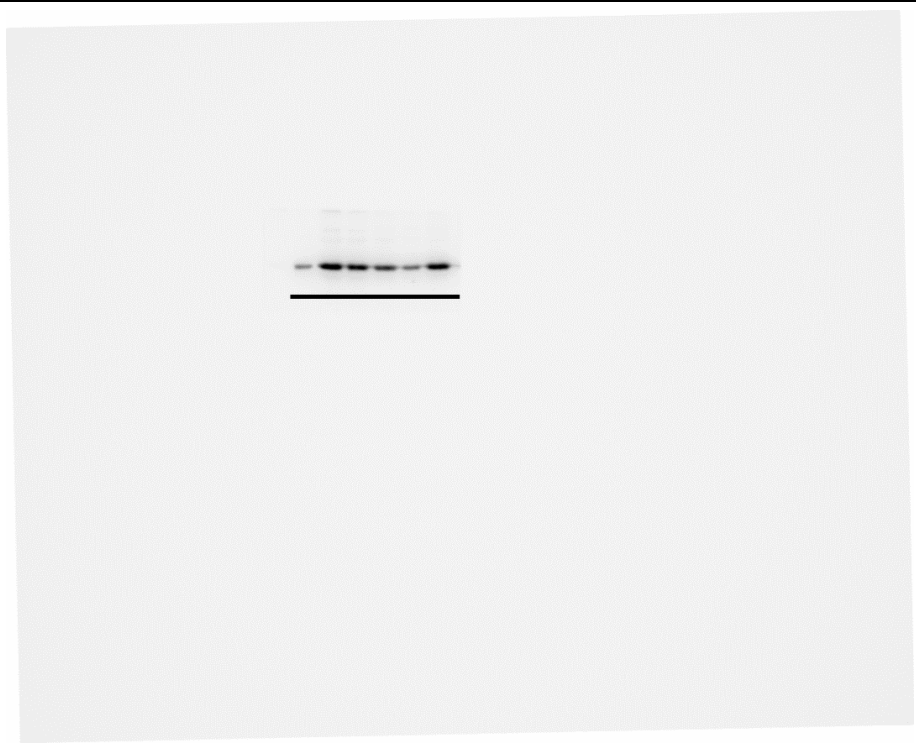

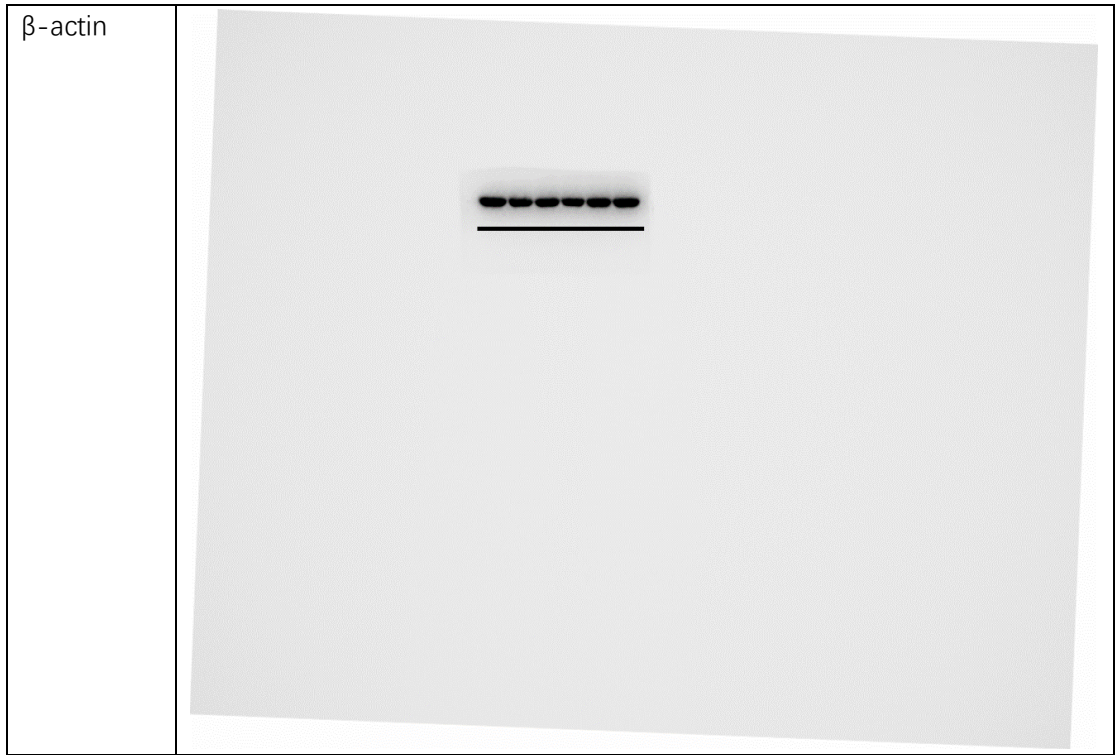

FIGURE S2B PMA-induced THP-1

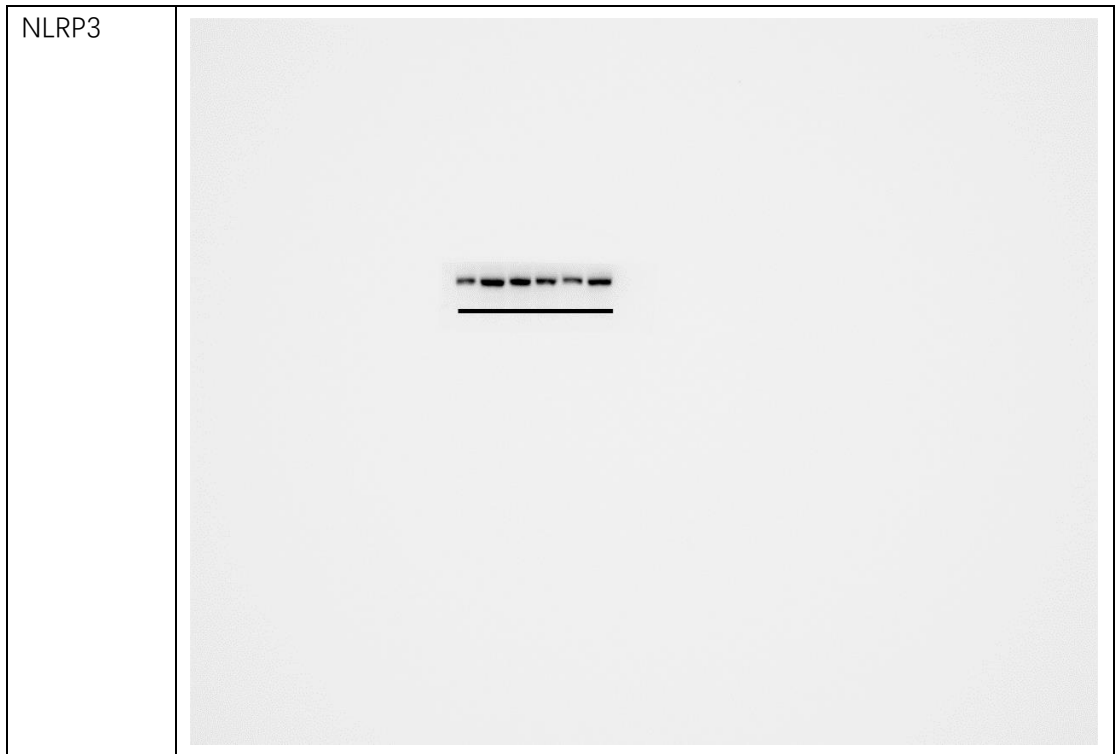

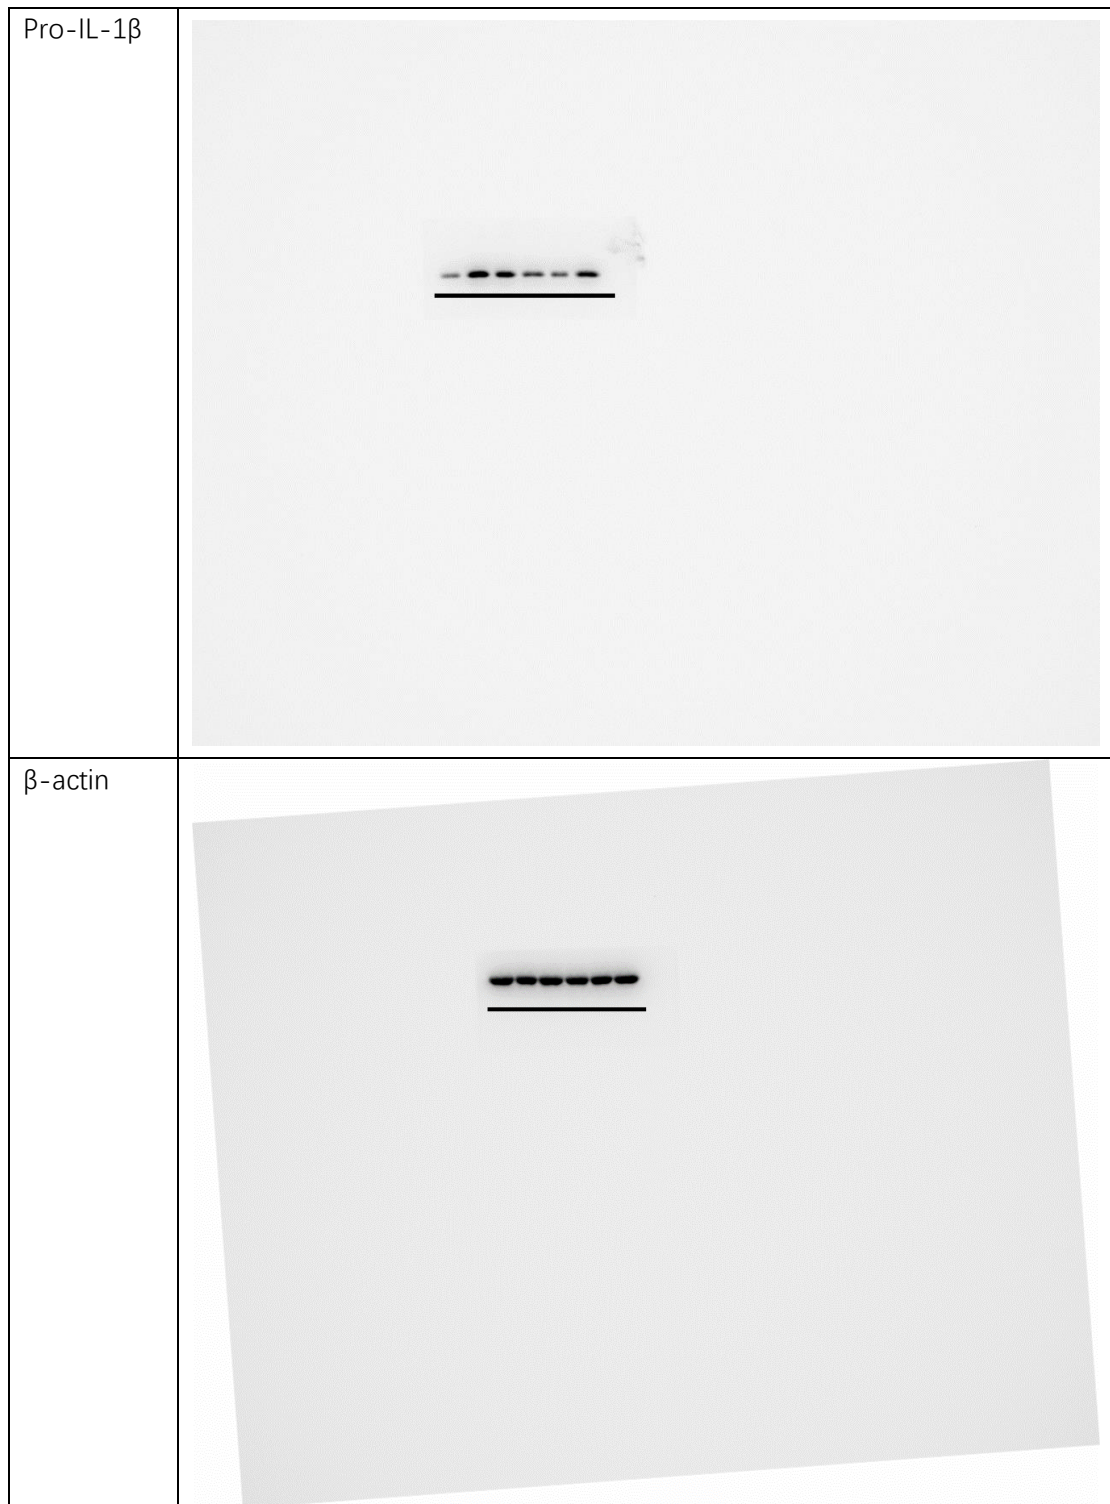

The original figures of immunofluorescent staining in figure S3.

|                            |                                                                                      |
|----------------------------|--------------------------------------------------------------------------------------|
| <p>Vehicle<br/>p65</p>     | 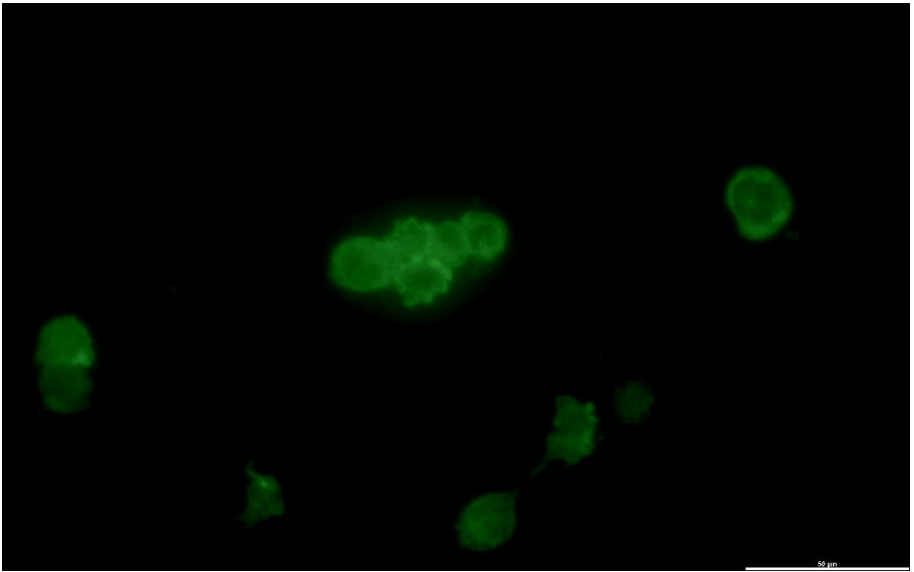   |
| <p>Vehicle<br/>Hoechst</p> |   |
| <p>Vehicle<br/>Merge</p>   |  |



|                |                                                                                      |
|----------------|--------------------------------------------------------------------------------------|
| LPS P65        | 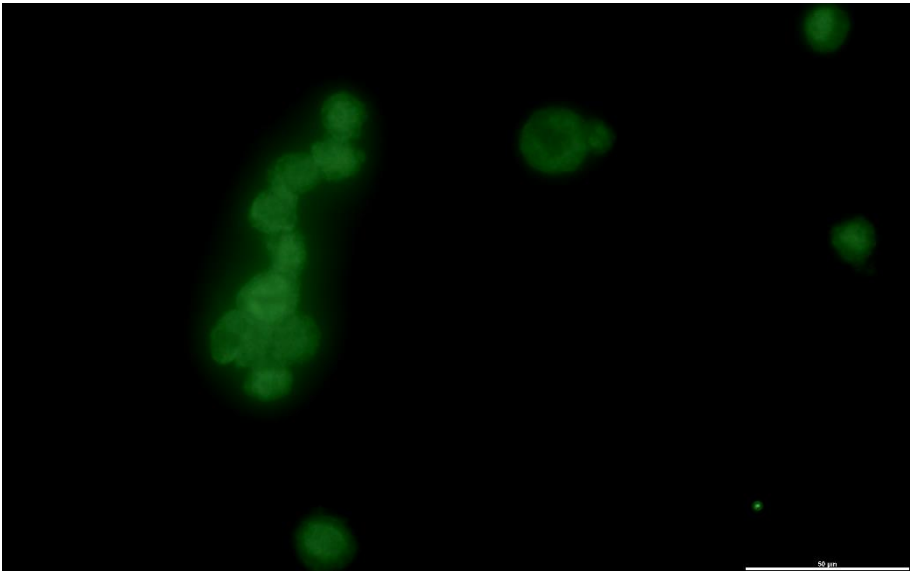   |
| LPS<br>Hoechst |   |
| LPS<br>Merge   |  |

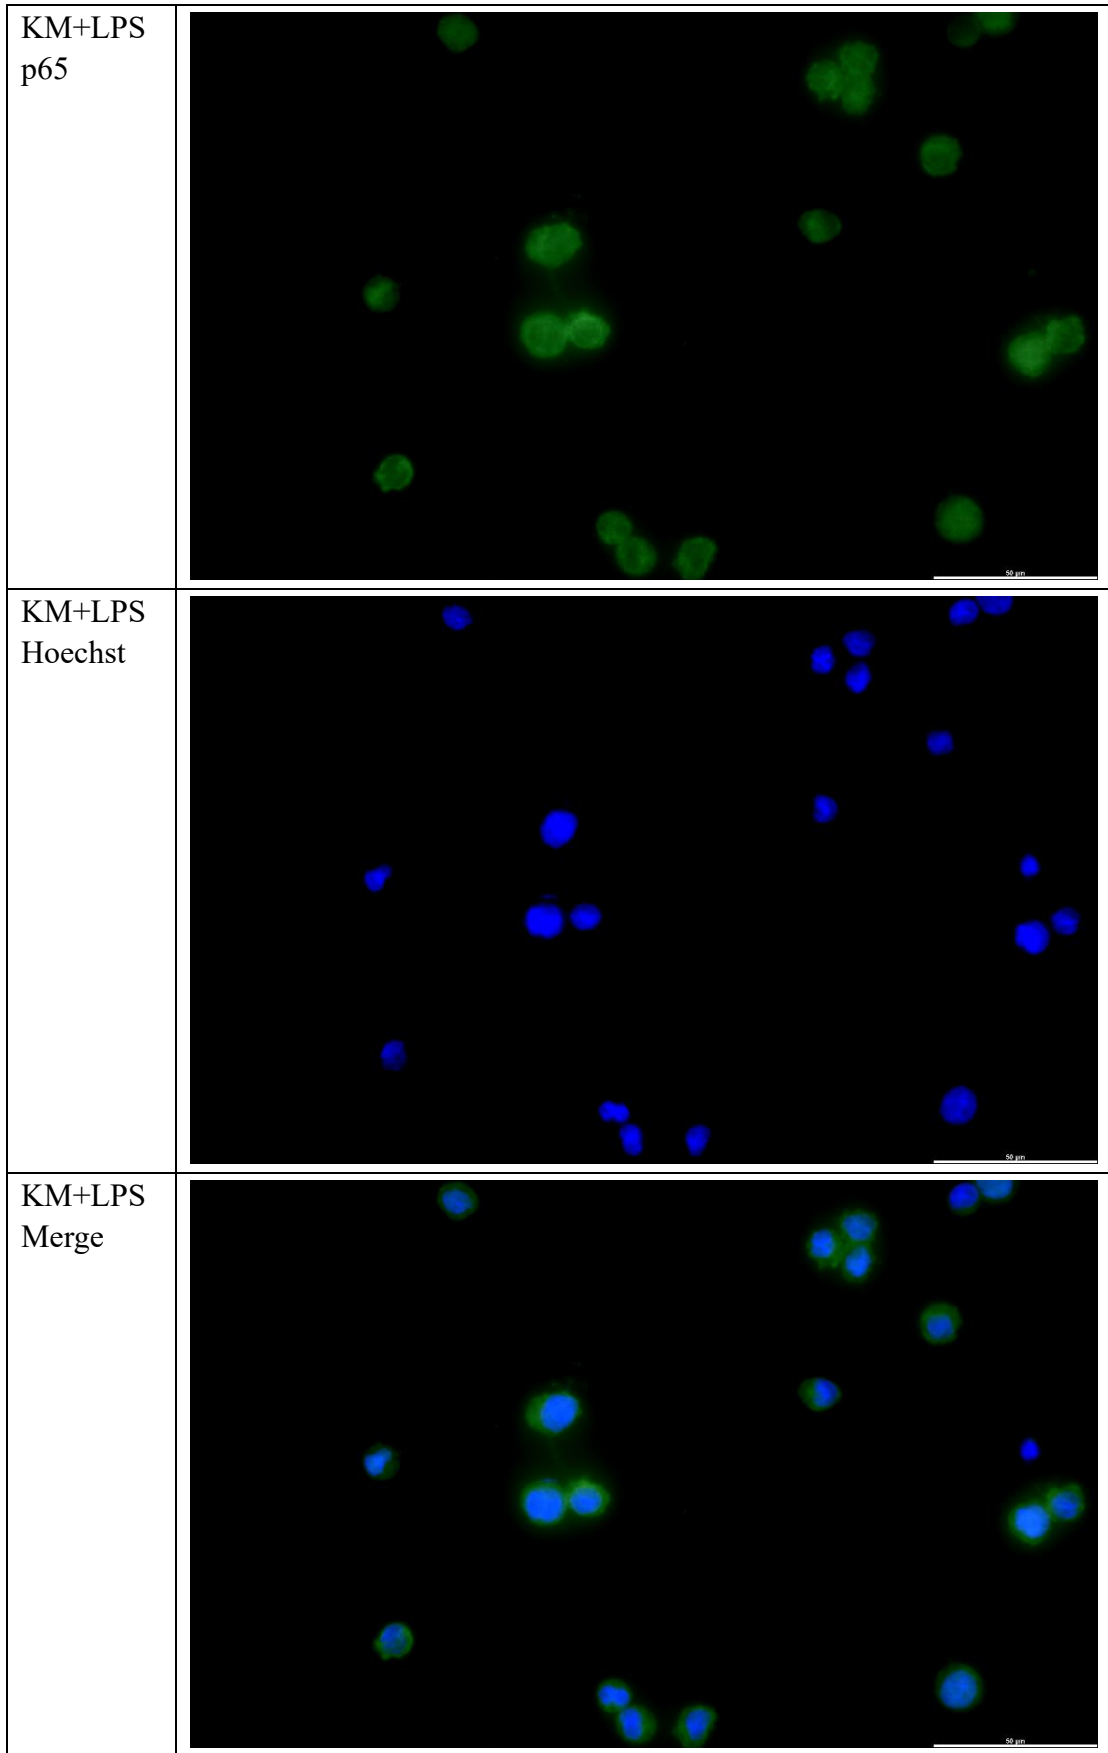

The original western blots of figure S4A.

ASC  
oligomerization

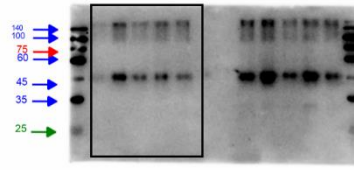

ASC

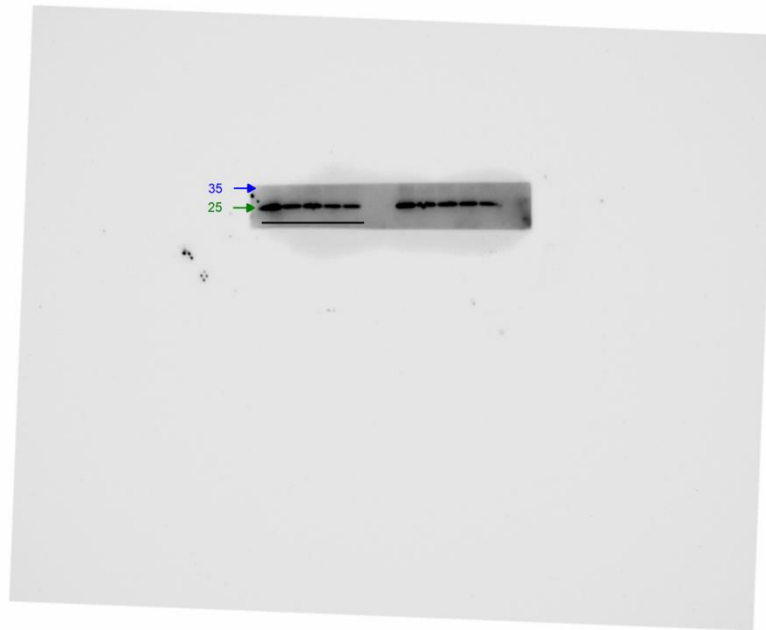

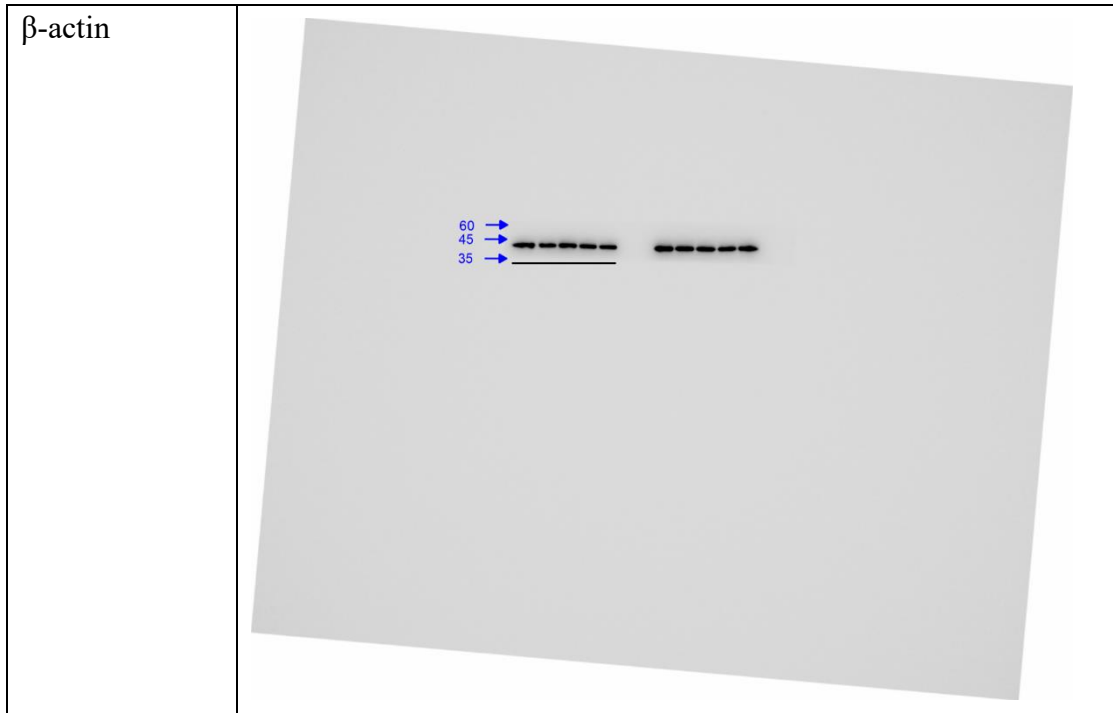

The original figures of immunofluorescent staining in figure S4B.

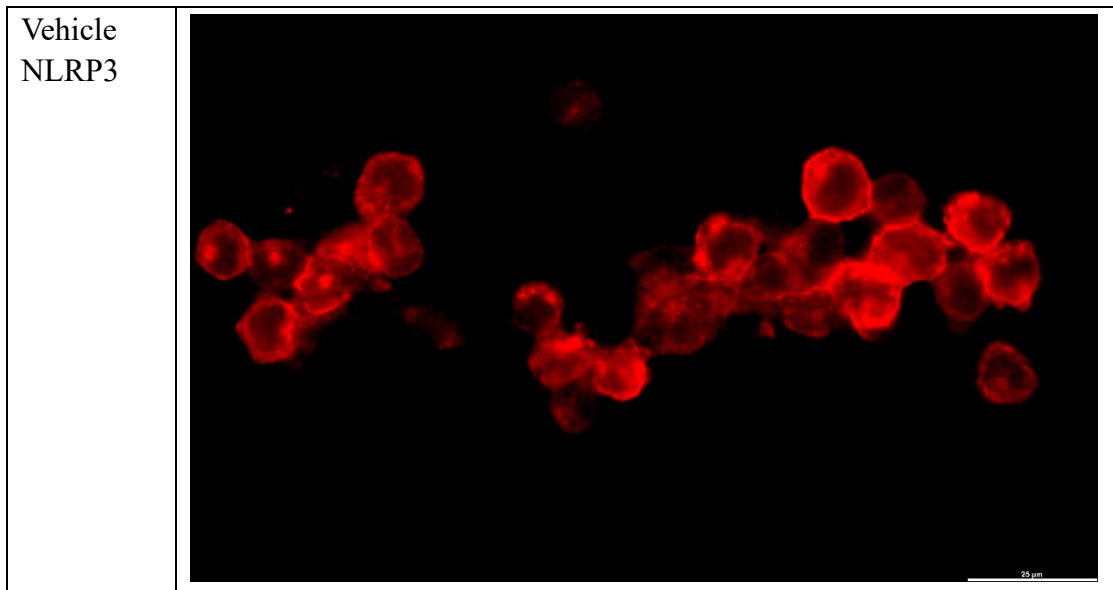

|                            |                                                                                                                                                                                                                                                                                                                                                                                                                                               |
|----------------------------|-----------------------------------------------------------------------------------------------------------------------------------------------------------------------------------------------------------------------------------------------------------------------------------------------------------------------------------------------------------------------------------------------------------------------------------------------|
| <p>Vehicle<br/>ASC</p>     | 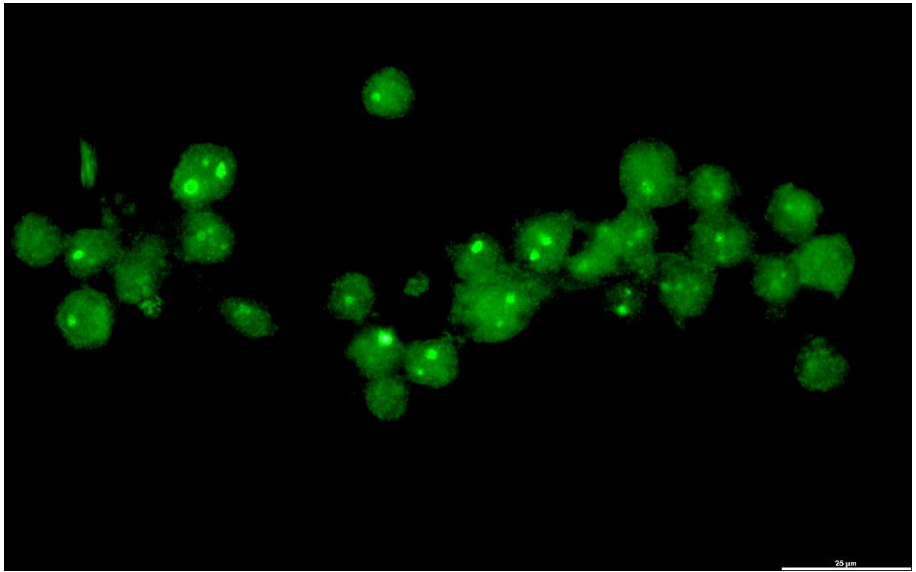 <p>A fluorescence microscopy image showing a cluster of cells with bright green fluorescence against a black background. The cells are irregularly shaped and appear to be in various stages of division or differentiation. A scale bar in the bottom right corner indicates 25 μm.</p>                                                                   |
| <p>Vehicle<br/>Hoechst</p> |  <p>A fluorescence microscopy image showing the same cluster of cells as the first panel, but with blue fluorescence. The blue signal highlights the nuclei of the cells, showing their overall morphology and arrangement. A scale bar in the bottom right corner indicates 25 μm.</p>                                                                    |
| <p>Vehicle<br/>Merge</p>   |  <p>A merged fluorescence microscopy image of the same cell cluster. It shows the green signal from the first panel, the blue nuclear signal from the second panel, and a red signal that appears to outline the cells. The red signal is most prominent in the larger, more clustered cells. A scale bar in the bottom right corner indicates 25 μm.</p> |

LPS+ATP  
NLRP3

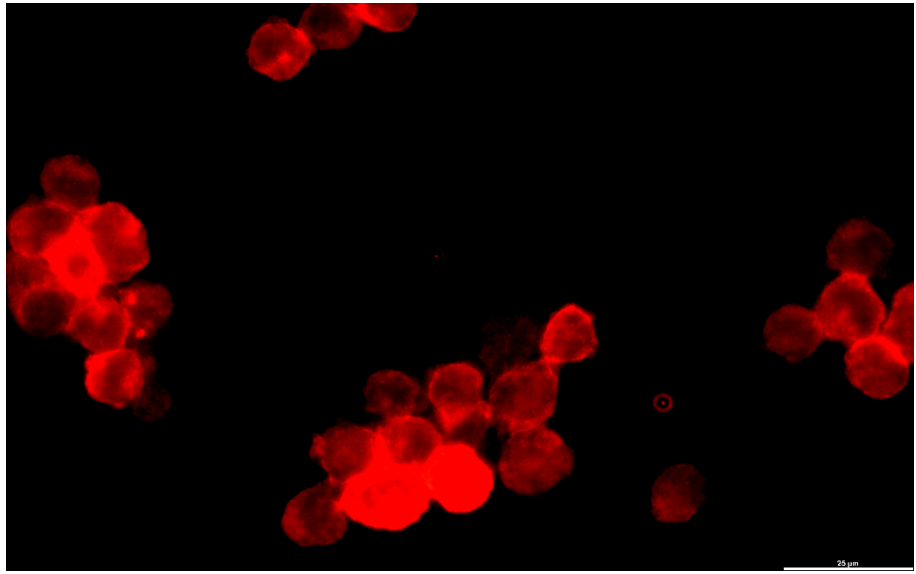

LPS+ATP  
ASC

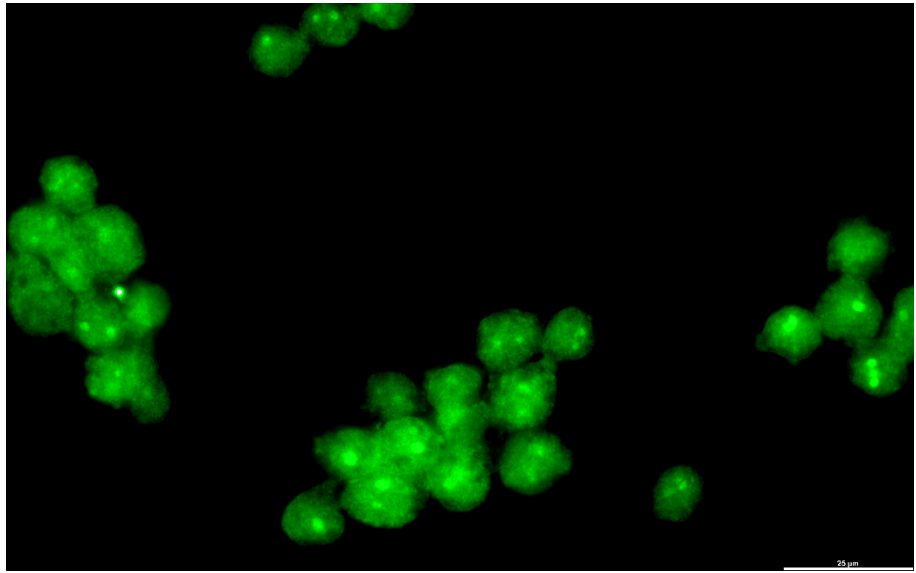

LPS+ATP  
Hoechst

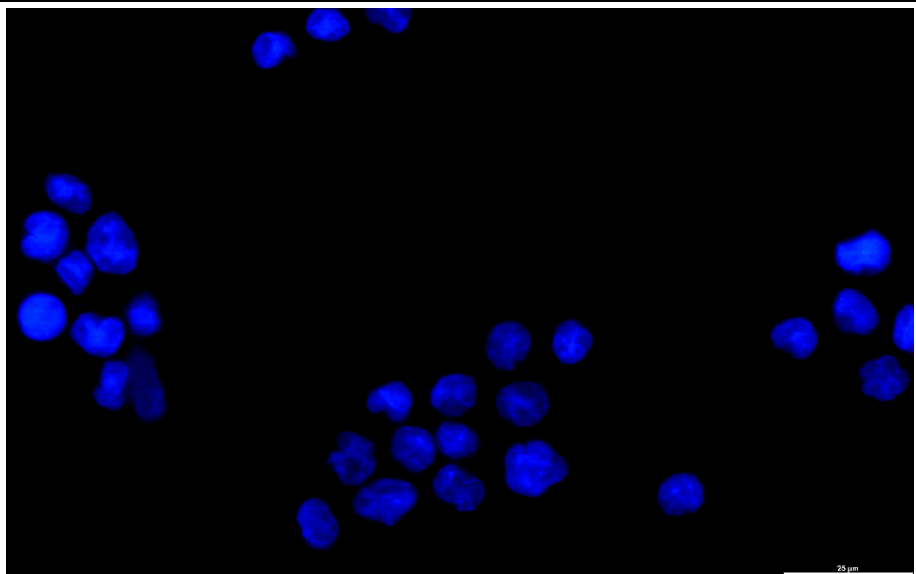

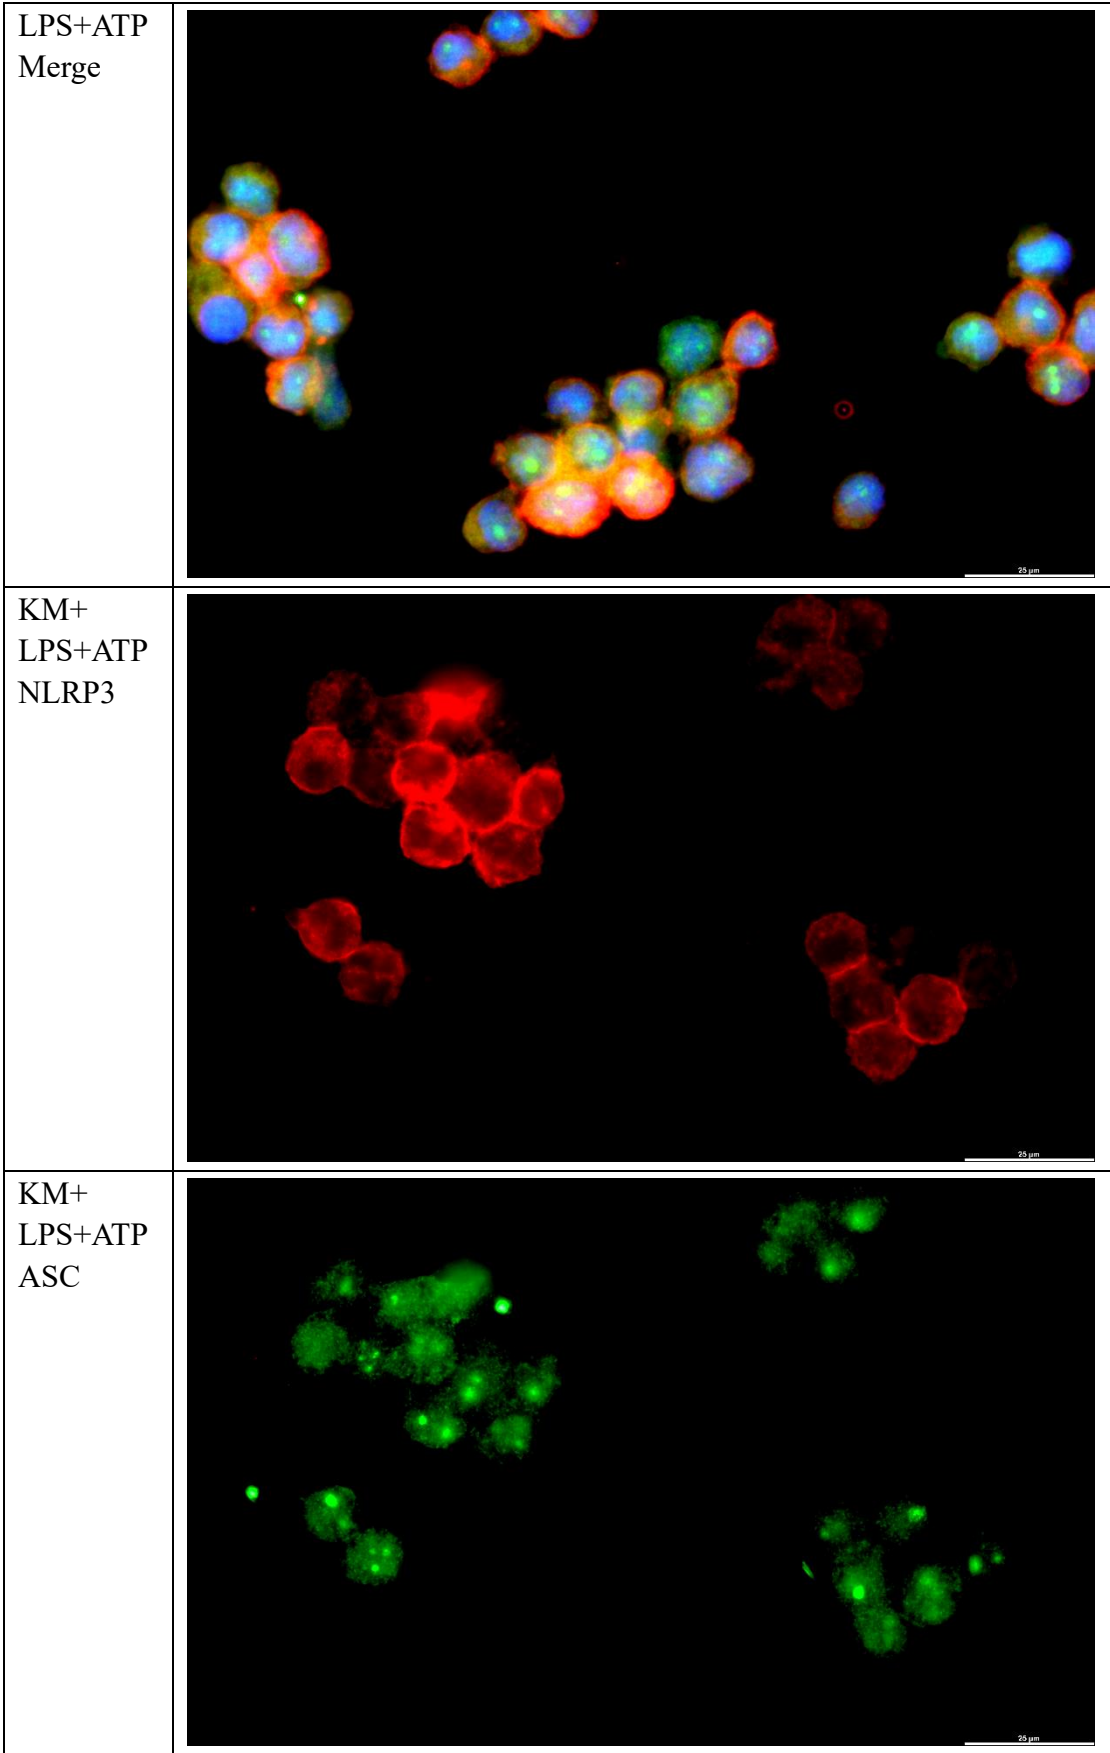

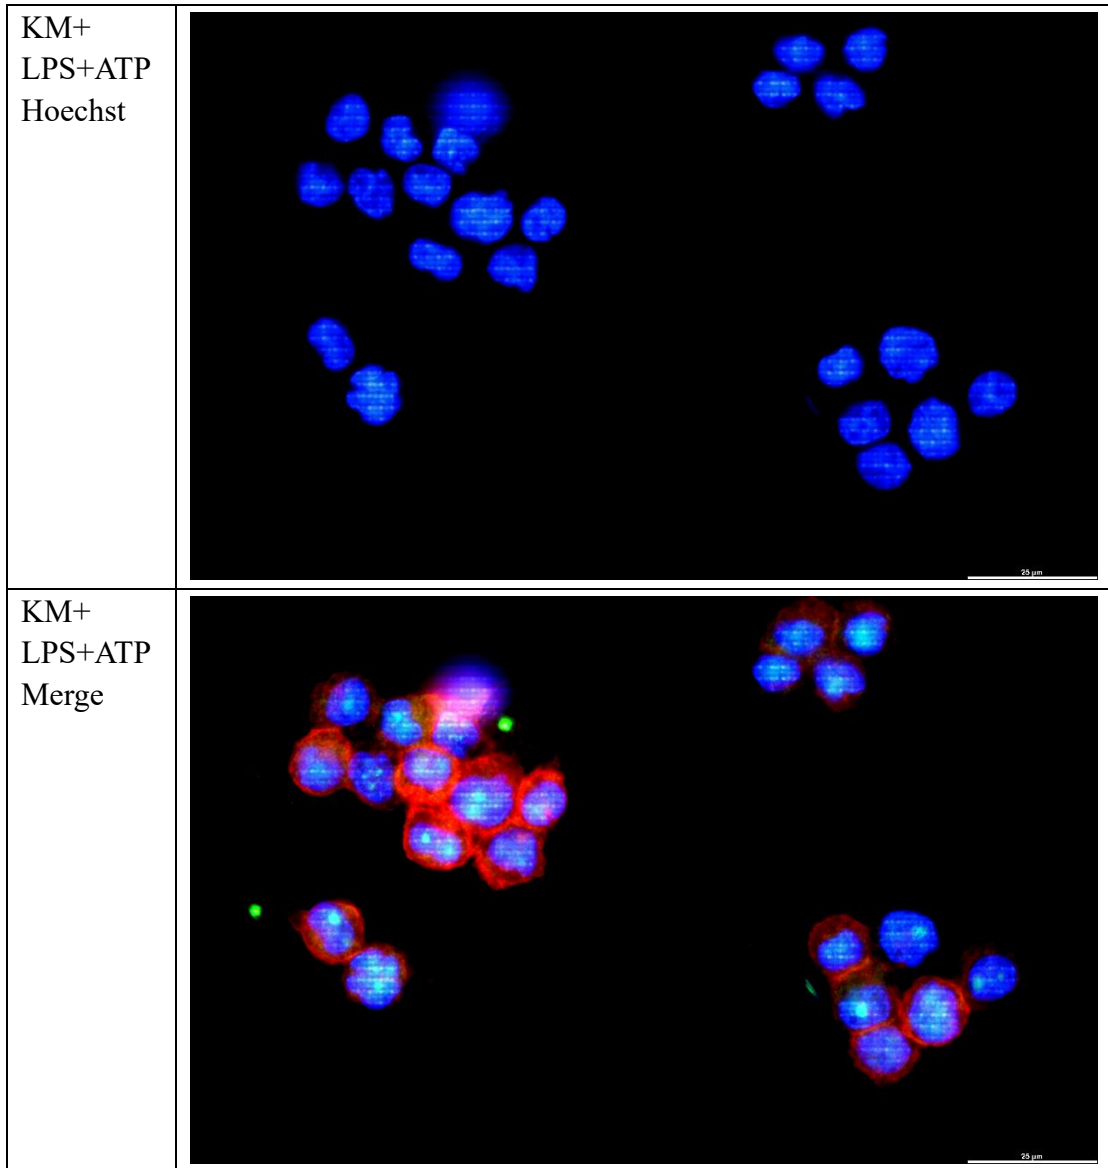

The original figures of DCFH-DA staining in figure S5.



Vehicle-  
DCFH-  
DA

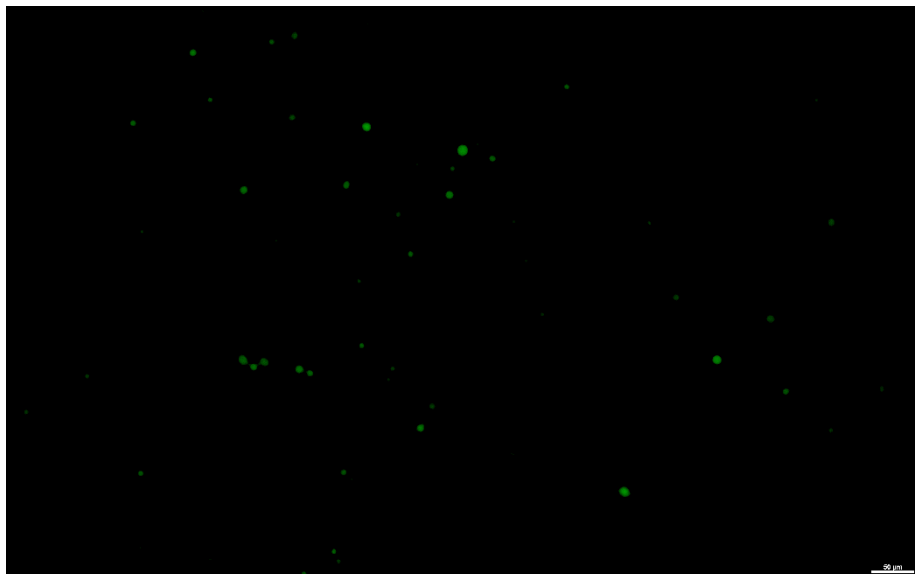

Vehicle-  
Hoechst

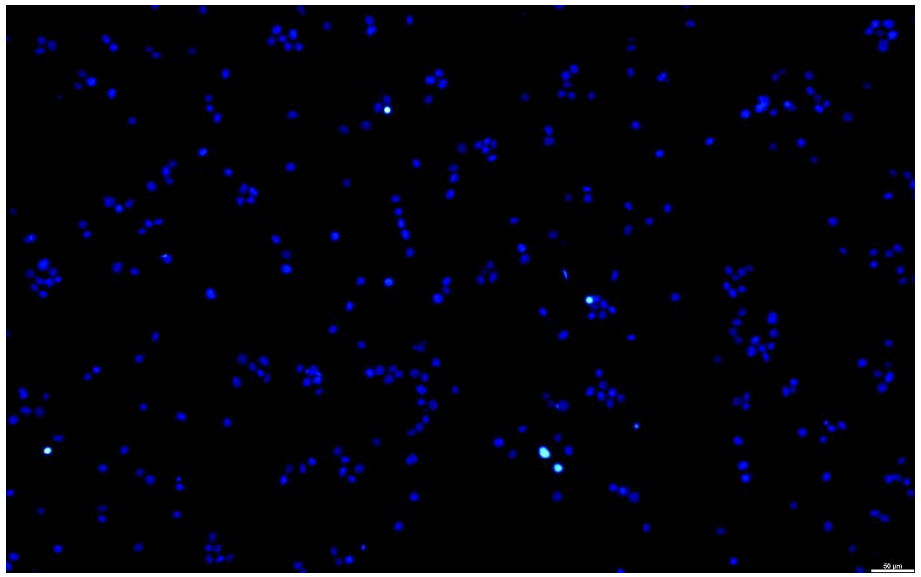

LPS+ATP-  
DCFH-  
DA

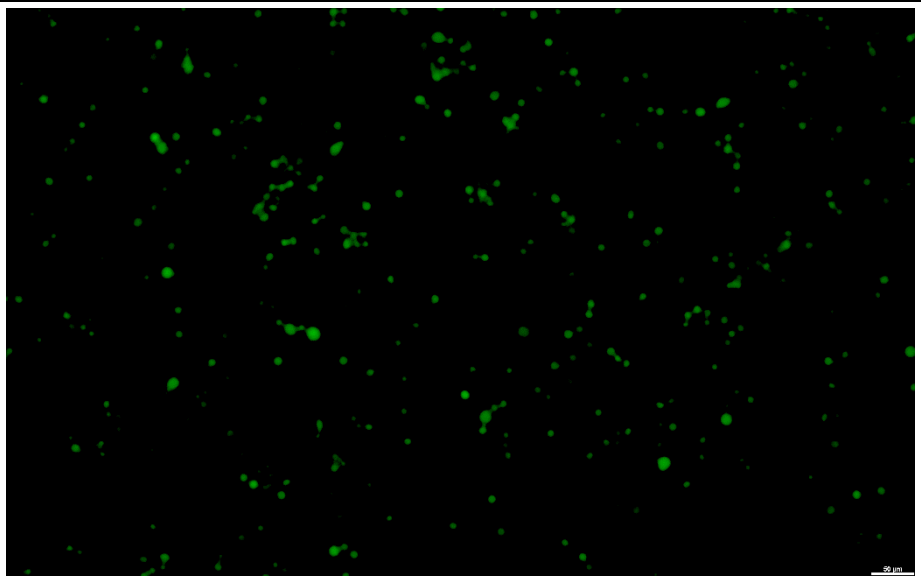

LPS+ATP  
-Hoechst

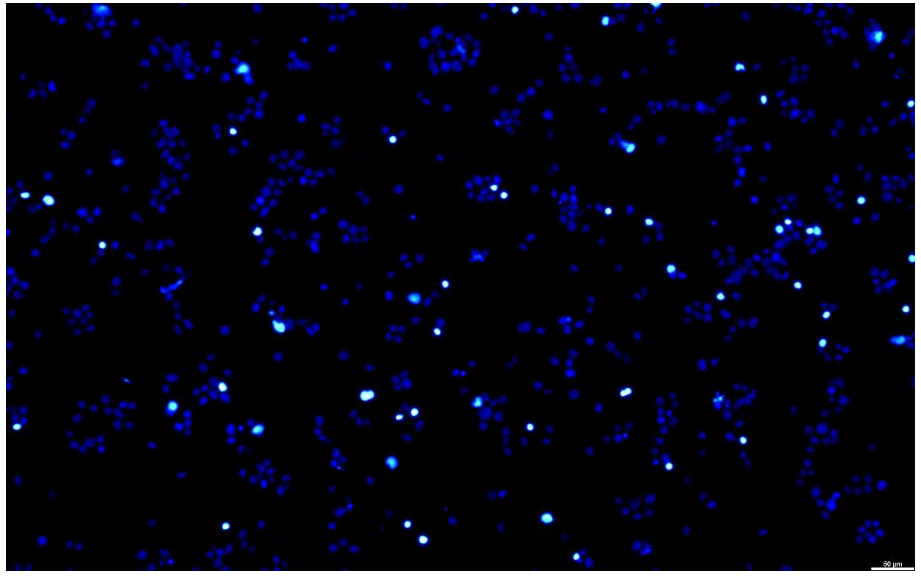

KM 200  
μM-  
DCFH-  
DA

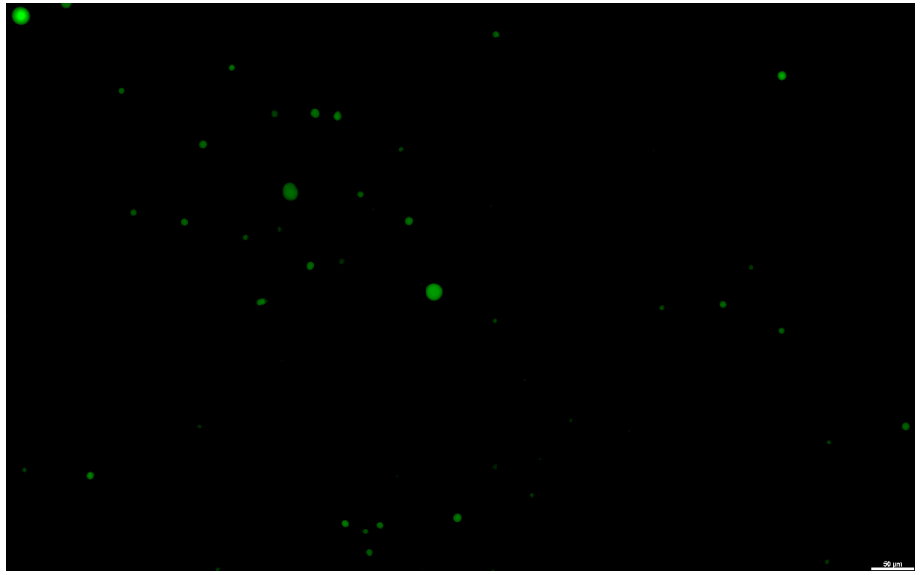

KM 200  
μM-  
Hoechst

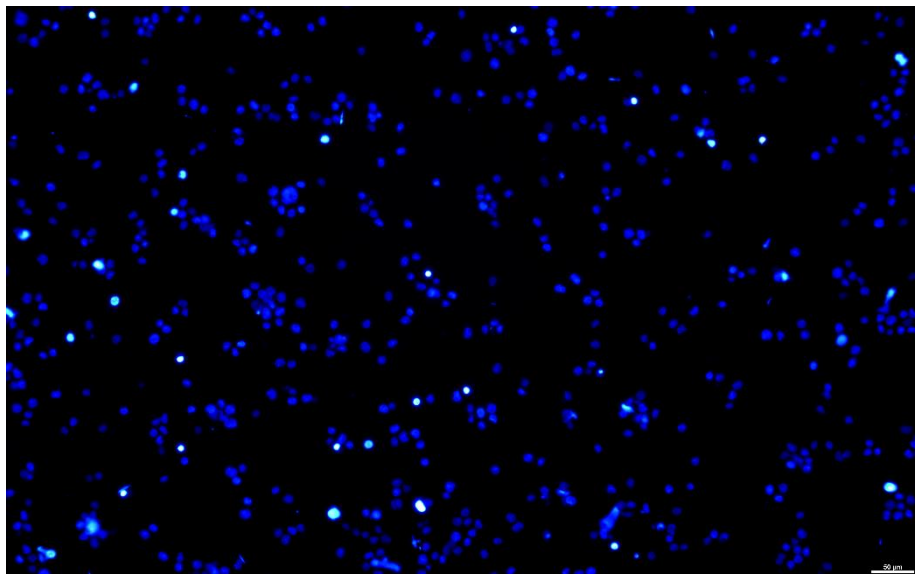

Supplement: datasheet1.pdf [file datasheet1.pdf]
